# Supplementary material for: Molecular characterization and phylogenetic analyses of Lophodermella needle pathogens (Rhytismataceae) on Pinus species in the USA and Europe
Source: PeerJ journal article supplement (doi:10.7717/peerj.11435), 2021-06-10
Supplement: Lophodermella_GenBank_Sequences.xlsx [file Lophodermella_GenBank_Sequences.xlsx]

## Sheet: ITS_Sequences
Internal transcribed spacer (ITS) sequences submitted to NCBI GenBank with their GenBank Accession Numbers
Sequence Number	Organism	Isolate_Number	Region	GenBank No.
>Seq1	[organism=Lophodermella conjuncta]	[isolate=PH18_0655]	internal transcribed spacer 1 partial sequence 5.8S ribosomal RNA gene complete sequence and internal transcribed spacer 2 partial sequence	MN937607
TAGAGGAAGTAAAAGTCGTAACAAGGTTTCCGTAGGTGAACCTGCGGAAGGATCATTACAGAAACGAGGCTCGCCCCTCGCCTTTCTCAACCCTTTGTTTACCATCCCCTGTTGCTTTGGCGGGTTCGCCCGCCAATGTAAACCCTCGAATGCCTGCCGTCTGAGTACGATATAATCGTTAAAACTTTCAACAACGGATCTCTTGGTTCTGGCATCGATGAAGAACGCAGCGAAATGCGATAAGTAATGTGAATTGCAGAATTCAGTGAATCATCGAATCTTTGAACGCACATTGCGCCCTCTGGTATTCCGGGGGGCATGCCTGTTCGAGCGTCATTACAACCCTCAAGCCTCGCTTGGTCGTGGGCTCTTTCGCCTTTCTAGGCTGGCCTCAAAAGC…
>Seq2	[organism=Lophodermella conjuncta]	[isolate=PHP19_0987]	internal transcribed spacer 1 partial sequence 5.8S ribosomal RNA gene complete sequence and internal transcribed spacer 2 partial sequence	MN937608
TAGAGGAAGTAAAAGTCGTAACAAGGTTTCCGTAGGTGAACCTGCGGAAGGATCATTACAGAAACGAGGCTCGCCCCTCGCCTTTCTCAACCCTTTGTTTACCATCCCCTGTTGCTTTGGCGGGTTCGCCCGCCAATGTAAACCCTCGAATGCCTGCCGTCTGAGTACGATATAATCGTTAAAACTTTCAACAACGGATCTCTTGGTTCTGGCATCGATGAAGAACGCAGCGAAATGCGATAAGTAATGTGAATTGCAGAATTCAGTGAATCATCGAATCTTTGAACGCACATTGCGCCCTCTGGTATTCCGGGGGGCATGCCTGTTCGAGCGTCATTACAACCCTCAAGCCTCGCTTGGTCGTGGGCTCTTTCGCCTTTCTAGGCTGGCCTCAAAAGC…
>Seq3	[organism=Lophodermella conjuncta]	[isolate=PHP19_0986]	internal transcribed spacer 1 partial sequence 5.8S ribosomal RNA gene complete sequence and internal transcribed spacer 2 partial sequence	MN937609
TAGAGGAAGTAAAAGTCGTAACAAGGTTTCCGTAGGTGAACCTGCGGAAGGATCATTACAGAAACGAGGCTCGCCCCTCGCCTTTCTCAACCCTTTGTTTACCATCCCCTGTTGCTTTGGCGGGTTCGCCCGCCAATGTAAACCCTCGAATGCCTGCCGTCTGAGTACGATATAATCGTTAAAACTTTCAACAACGGATCTCTTGGTTCTGGCATCGATGAAGAACGCAGCGAAATGCGATAAGTAATGTGAATTGCAGAATTCAGTGAATCATCGAATCTTTGAACGCACATTGCGCCCTCTGGTATTCCGGGGGGCATGCCTGTTCGAGCGTCATTACAACCCTCAAGCCTCGCTTGGTCGTGGGCTCTTTCGCCTTTCTAGGCTGGCCTCAAAAGC…
>Seq4	[organism=Lophodermella concolor]	[isolate=FS8C]	internal transcribed spacer 1 partial sequence 5.8S ribosomal RNA gene complete sequence and internal transcribed spacer 2 partial sequence	MN937610
CGGAAGGATCATTAAGGAAGATCGCGCACAAGAGCGCTTGAGCTTCTCACCCCCTGTATACCAAGCTTTGTTGCTTTGGCAGGCCTCTGGCTCCGGCTGGGCAGCGCCTGTCAGAGACCTCAACCCCAGGAATCACTGATGTCTGAGTAACTACACAATCGTTAAAACTTTCAACAACGGATCTCTTGGTTCTGGCATCGATGAAGAACGCAGCGAAATGCGATAAGTAATGTGAATTGCAGAATTCAGTGAACCATCGAATCTTTGAACGCATATTGCGCCCTCTGGTATTCCGGGGGGCATGCCTGTTCGAGCGTCATCAACCAGCCCTCAAGCTCTGCTTGGTCTTGGGCCGACCGCCAGGCCGGCCCCAAAATCATTGGCAGCGCCGTCTGACCC…
>Seq5	[organism=Lophodermella concolor]	[isolate=OJ11C]	internal transcribed spacer 1 partial sequence 5.8S ribosomal RNA gene complete sequence and internal transcribed spacer 2 partial sequence	MN937611
AGAGCGCTTGAGCTTCTCACCCCCTGTATACCAAGCTTTGTTGCTTTGGCAGGCCTCTGGCTCCGGCTGGGCAGCGCCTGTCAGAGACCTCAACCCCAGGAATCACTGATGTCTGAGTAACTACACAATCGTTAAAACTTTCAACAACGGATCTCTTGGTTCTGGCATCGATGAAGAACGCAGCGAAATGCGATAAGTAATGTGAATTGCAGAATTCAGTGAACCATCGAATCTTTGAACGCATATTGCGCCCTCTGGTATTCCGGGGGGCATGCCTGTTCGAGCGTCATCAACCAGCCCTCAAGCTCTGCTTGGTCTTGGGCCGACCGCCAGGCCGGCCCCAAAATCATTGGCAGCGCCGTCTGACCCTAAGCGCAGTAGTTCTCTCGCCGCTTTTGG…
>Seq6	[organism=Lophodermella concolor]	[isolate=CS9C]	internal transcribed spacer 1 partial sequence 5.8S ribosomal RNA gene complete sequence and internal transcribed spacer 2 partial sequence	MN937612
CCCCTGTATACCAAGCTTTGTTGCTTTGGCAGGCCTCTGGCTCCGGCTGGGCAGCGCCTGTCAGAGACCTCAACCCCAGGAATCACTGATGTCTGAGTAACTACACAATCGTTAAAACTTTCAACAACGGATCTCTTGGTTCTGGCATCGATGAAGAACGCAGCGAAATGCGATAAGTAATGTGAATTGCAGAATTCAGTGAACCATCGAATCTTTGAACGCATATTGCGCCCTCTGGTATTCCGGGGGGCATGCCTGTTCGAGCGTCATCAACCAGCCCTCAAGCTCTGCTTGGTCTTGGGCCGACCGCCAGGCCGGCCCCAAAATCATTGGCAGCGCCGTCTGACCCTAAGCGCAGTAGTTCTCTCGCCGCTTTTGGGCTCGGGCAGCCGACTGTCA…
>Seq7	[organism=Lophodermella concolor]	[isolate=SR6C]	internal transcribed spacer 1 partial sequence 5.8S ribosomal RNA gene complete sequence and internal transcribed spacer 2 partial sequence	MN937613
AGAGCGCTTGAGCTTCTCACCCCCTGTATACCAAGCTTTGTTGCTTTGGCAGGCCTCTGGCTCCGGCTGGGCAGCGCCTGTCAGAGACCTCAACCCCAGGAATCACTGATGTCTGAGTAACTACACAATCGTTAAAACTTTCAACAACGGATCTCTTGGTTCTGGCATCGATGAAGAACGCAGCGAAATGCGATAAGTAATGTGAATTGCAGAATTCAGTGAACCATCGAATCTTTGAACGCATATTGCGCCCTCTGGTATTCCGGGGGGCATGCCTGTTCGAGCGTCATCAACCAGCCCTCAAGCTCTGCTTGGTCTTGGGCCGACCGCCAGGCCGGCCCCAAAATCATTGGCAGCGCCGTCTGACCCTAAGCGCAGTAGTTCTCTCGCCGCTTTTGG…
>Seq8	[organism=Lophodermella concolor]	[isolate=PT3C]	internal transcribed spacer 1 partial sequence 5.8S ribosomal RNA gene complete sequence and internal transcribed spacer 2 partial sequence	MN937614
AGAGCGCTTGAGCTTCTCACCCCCTGTATACCAAGCTTTGTTGCTTTGGCAGGCCTCTGGCTCCGGCTGGGCAGCGCCTGTCAGAGACCTCAACCCCAGGAATCACTGATGTCTGAGTAACTACACAATCGTTAAAACTTTCAACAACGGATCTCTTGGTTCTGGCATCGATGAAGAACGCAGCGAAATGCGATAAGTAATGTGAATTGCAGAATTCAGTGAACCATCGAATCTTTGAACGCATATTGCGCCCTCTGGTATTCCGGGGGGCATGCCTGTTCGAGCGTCATCAACCAGCCCTCAAGCTCTGCTTGGTCTTGGGCCGACCGCCAGGCCGGCCCCAAAATCATTGGCAGCGCCGTCTGACCCTAAGCGCAGTAGTTCTCTCGCCGCTTTTGG…
>Seq9	[organism=Lophodermella concolor]	[isolate=LV8C]	internal transcribed spacer 1 partial sequence 5.8S ribosomal RNA gene complete sequence and internal transcribed spacer 2 partial sequence	MN937615
AGAGCGCTTGAGCTTCTCACCCCCTGTATACCAAGCTTTGTTGCTTTGGCAGGCCTCTGGCTCCGGCTGGGCAGCGCCTGTCAGAGACCTCAACCCCAGGAATCACTGATGTCTGAGTAACTACACAATCGTTAAAACTTTCAACAACGGATCTCTTGGTTCTGGCATCGATGAAGAACGCAGCGAAATGCGATAAGTAATGTGAATTGCAGAATTCAGTGAACCATCGAATCTTTGAACGCATATTGCGCCCTCTGGTATTCCGGGGGGCATGCCTGTTCGAGCGTCATCAACCAGCCCTCAAGCTCTGCTTGGTCTTGGGCCGACCGCCAGGCCGGCCCCAAAATCATTGGCAGCGCCGTCTGACCCTAAGCGCAGTAGTTCTCTCGCCGCTTTTGG…
>Seq10	[organism=Lophodermella concolor]	[isolate=PT2C]	internal transcribed spacer 1 partial sequence 5.8S ribosomal RNA gene complete sequence and internal transcribed spacer 2 partial sequence	MN937616
AGAGCGCTTGAGCTTCTCACCCCCTGTATACCAAGCTTTGTTGCTTTGGCAGGCCTCTGGCTCCGGCTGGGCAGCGCCTGTCAGAGACCTCAACCCCAGGAATCACTGATGTCTGAGTAACTACACAATCGTTAAAACTTTCAACAACGGATCTCTTGGTTCTGGCATCGATGAAGAACGCAGCGAAATGCGATAAGTAATGTGAATTGCAGAATTCAGTGAACCATCGAATCTTTGAACGCATATTGCGCCCTCTGGTATTCCGGGGGGCATGCCTGTTCGAGCGTCATCAACCAGCCCTCAAGCTCTGCTTGGTCTTGGGCCGACCGCCAGGCCGGCCCCAAAATCATTGGCAGCGCCGTCTGACCCTAAGCGCAGTAGTTCTCTCGCCGCTTTTGG…
>Seq11	[organism=Lophodermella concolor]	[isolate=SR3C]	internal transcribed spacer 1 partial sequence 5.8S ribosomal RNA gene complete sequence and internal transcribed spacer 2 partial sequence	MN937617
AGAGCGCTTGAGCTTCTCACCCCCTGTATACCAAGCTTTGTTGCTTTGGCAGGCCTCTGGCTCCGGCTGGGCAGCGCCTGTCAGAGACCTCAACCCCAGGAATCACTGATGTCTGAGTAACTACACAATCGTTAAAACTTTCAACAACGGATCTCTTGGTTCTGGCATCGATGAAGAACGCAGCGAAATGCGATAAGTAATGTGAATTGCAGAATTCAGTGAACCATCGAATCTTTGAACGCATATTGCGCCCTCTGGTATTCCGGGGGGCATGCCTGTTCGAGCGTCATCAACCAGCCCTCAAGCTCTGCTTGGTCTTGGGCCGACCGCCAGGCCGGCCCCAAAATCATTGGCAGCGCCGTCTGACCCTAAGCGCAGTAGTTCTCTCGCCGCTTTTGG…
>Seq12	[organism=Lophodermella concolor]	[isolate=FS6C]	internal transcribed spacer 1 partial sequence 5.8S ribosomal RNA gene complete sequence and internal transcribed spacer 2 partial sequence	MN937618
AGAGCGCTTGAGCTTCTCACCCCCTGTATACCAAGCTTTGTTGCTTTGGCAGGCCTCTGGCTCCGGCTGGGCAGCGCCTGTCAGAGACCTCAACCCCAGGAATCACTGATGTCTGAGTAACTACACAATCGTTAAAACTTTCAACAACGGATCTCTTGGTTCTGGCATCGATGAAGAACGCAGCGAAATGCGATAAGTAATGTGAATTGCAGAATTCAGTGAACCATCGAATCTTTGAACGCATATTGCGCCCTCTGGTATTCCGGGGGGCATGCCTGTTCGAGCGTCATCAACCAGCCCTCAAGCTCTGCTTGGTCTTGGGCCGACCGCCAGGCCGGCCCCAAAATCATTGGCAGCGCCGTCTGACCCTAAGCGCAGTAGTTCTCTCGCCGCTTTTGG…
>Seq13	[organism=Lophodermella concolor]	[isolate=CS6C]	internal transcribed spacer 1 partial sequence 5.8S ribosomal RNA gene complete sequence and internal transcribed spacer 2 partial sequence	MN937619
AGAGCGCTTGAGCTTCTCACCCCCTGTATACCAAGCTTTGTTGCTTTGGCAGGCCTCTGGCTCCGGCTGGGCAGCGCCTGTCAGAGACCTCAACCCCAGGAATCACTGATGTCTGAGTAACTACACAATCGTTAAAACTTTCAACAACGGATCTCTTGGTTCTGGCATCGATGAAGAACGCAGCGAAATGCGATAAGTAATGTGAATTGCAGAATTCAGTGAACCATCGAATCTTTGAACGCATATTGCGCCCTCTGGTATTCCGGGGGGCATGCCTGTTCGAGCGTCATCAACCAGCCCTCAAGCTCTGCTTGGTCTTGGGCCGACCGCCAGGCCGGCCCCAAAATCATTGGCAGCGCCGTCTGACCCTAAGCGCAGTAGTTCTCTCGCCGCTTTTGG…
>Seq14	[organism=Lophodermella concolor]	[isolate=LV7C]	internal transcribed spacer 1 partial sequence 5.8S ribosomal RNA gene complete sequence and internal transcribed spacer 2 partial sequence	MN937620
AGAGCGCTTGAGCTTCTCACCCCCTGTATACCAAGCTTTGTTGCTTTGGCAGGCCTCTGGCTCCGGCTGGGCAGCGCCTGTCAGAGACCTCAACCCCAGGAATCACTGATGTCTGAGTAACTACACAATCGTTAAAACTTTCAACAACGGATCTCTTGGTTCTGGCATCGATGAAGAACGCAGCGAAATGCGATAAGTAATGTGAATTGCAGAATTCAGTGAACCATCGAATCTTTGAACGCATATTGCGCCCTCTGGTATTCCGGGGGGCATGCCTGTTCGAGCGTCATCAACCAGCCCTCAAGCTCTGCTTGGTCTTGGGCCGACCGCCAGGCCGGCCCCAAAATCATTGGCAGCGCCGTCTGACCCTAAGCGCAGTAGTTCTCTCGCCGCTTTTGG…
>Seq15	[organism=Lophodermella concolor]	[isolate=LP7C]	internal transcribed spacer 1 partial sequence 5.8S ribosomal RNA gene complete sequence and internal transcribed spacer 2 partial sequence	MN937621
CGCTTGAGCTTCTCACCCCCTGTATACCAAGCTTTGTTGCTTTGGCAGGCCTCTGGCTCCGGCTGGGCAGCGCCTGTCAGAGACCTCAACCCCAGGAATCACTGATGTCTGAGTAACTACACAATCGTTAAAACTTTCAACAACGGATCTCTTGGTTCTGGCATCGATGAAGAACGCAGCGAAATGCGATAAGTAATGTGAATTGCAGAATTCAGTGAACCATCGAATCTTTGAACGCATATTGCGCCCTCTGGTATTCCGGGGGGCATGCCTGTTCGAGCGTCATCAACCAGCCCTCAAGCTCTGCTTGGTCTTGGGCCGACCGCCAGGCCGGCCCCAAAATCATTGGCAGCGCCGTCTGACCCTAAGCGCAGTAGTTCTCTCGCCGCTTTTGGGCTC…
>Seq16	[organism=Lophodermella montivaga]	[isolate=PT10M]	internal transcribed spacer 1 partial sequence 5.8S ribosomal RNA gene complete sequence and internal transcribed spacer 2 partial sequence	MN937622
GGGGACCGAAACTCGTGAATCAGTGATGTCTGAGCACTATCTAATAGTTAAAAACTTTCAACAACGGATCTCTTGGTTCTGGCATCGATGAAGAACGCAGCGAAATGCGATAAGTAATGTGAATTGCAGAATTCAGTGAATCATCGAATCTTTGAACGCACATTGCGCCCTCTGGCATTCCGGAGGGCATGCCTGTTCGAGCGTCATTACAACCCTCAAGCTCTGCTTGGTCTTGGGCTGGCCCGTCGGGGCCCGCCTGGAAATCAGTGGCGGCACTGCCCGACCCCTCAGCGGAGTACGTCCATTCTCGCTGCTGGGCTCGGGCCACAGCCTGCCAGCAACCCCCC
>Seq17	[organism=Lophophacidium dooksii]	[isolate=MB5]	internal transcribed spacer 1 partial sequence 5.8S ribosomal RNA gene complete sequence and internal transcribed spacer 2 partial sequence	MN937623
CCCTTTTGTCTACCTTCTCCGTTGCTTTGGCAGGCCTCCGGCTCCGGCTGGGCAGCCCCTGCCAGGGGACCTAAACTCGTGAATCAGTGATGTKTGCGCACTATCTAATAGTCAAAAACTTTCAACAACGGATCTCTTGGTTCTGGCATCGATGAAGAACGCAGCGAAATGCGATAAGTAATGTGAATTGCAGAATTCAGTGAATCATCGAATCTTTGAACGCACATTGCGCCCTCTGGCATTCCGGAGGGCATGCCTGTTCGAGCGTCATTAACAACCCTCAAGCTCCGCTTGGTCTTGGGCTGGCCCTTCCGGGCCACCCTGGAAATCAGGGGCGGCACGGCCCGACCCCTAAGCGGAGTACTTCCATCCTCGC
>Seq18	[organism=Lophodermella sulcigena]	[isolate=PH18_0656]	internal transcribed spacer 1 partial sequence 5.8S ribosomal RNA gene complete sequence and internal transcribed spacer 2 partial sequence	MN937624
TGACCTGCGGAGGATCATTATTGAGCATGGCGGGGGTGAAACCCCCGCCTGGTAACTCGCACCCTTTGTCTACCTTCTCTGTTGCTTTGGCAGGCCTCCGGCTCCGGCTGGGCAGCGCCTGCCAGGGGACCGAAACTCGTGAATCAGTGATGTCTGGGCACTATCTAATAGTTAAAAACTTTCAACAACGGATCTCTTGGTTCTGGCATCGATGAAGAACGCAGCGAAATGCGATAAGTAATGTGAATTGCAGAATTCAGTGAATCATCGAATCTTTGAACGCACATTGCGCCCTCTGGCATTCCGGAGGGCATGCCTGTTCGAGCGTCATTACAACCCTCAAGCTCTGCTTGGTCTTGGGCCGGCCCTCTGGGGCCAGCCTGGAAATCAGTGGCGGCA…
>Seq19	[organism=Lophodermella montivaga]	[isolate=NC2M]	internal transcribed spacer 1 partial sequence 5.8S ribosomal RNA gene complete sequence and internal transcribed spacer 2 partial sequence	MN937625
CGCCTGGTAAAACTCGCACCCTCTGTCTACCTTCTCTGTTGCTTTGGCAGGCCTCCGGCTCCGGCTGGGCCGCGCCTGCCAGGGGACCGAAACTCGTGAATCAGTGATGTCTGAGCACTATCTAATAGTTAAAAACTTTCAACAACGGATCTCTTGGTTCTGGCATCGATGAAGAACGCAGCGAAATGCGATAAGTAATGTGAATTGCAGAATTCAGTGAATCATCGAATCTTTGAACGCACATTGCGCCCTCTGGCATTCCGGAGGGCATGCCTGTTCGAGCGTCATTACAACCCTCAAGCTCTGCTTGGTCTTGGGCTGGCCCGTCGGGGCCCGCCTGGAAATCAGTGGCGGCACTGCCCGACCCCTCAGCGGAGTACGTCCATTCTCGCTGCTGGG…
>Seq20	[organism=Lophodermella montivaga]	[isolate=NC6M]	internal transcribed spacer 1 partial sequence 5.8S ribosomal RNA gene complete sequence and internal transcribed spacer 2 partial sequence	MN937626
CGCCTGGTAAAACTCGCACCCTCTGTCTACCTTCTCTGTTGCTTTGGCAGGCCTCCGGCTCCGGCTGGGCCGCGCCTGCCAGGGGACCGAAACTCGTGAATCAGTGATGTCTGAGCACTATCTAATAGTTAAAAACTTTCAACAACGGATCTCTTGGTTCTGGCATCGATGAAGAACGCAGCGAAATGCGATAAGTAATGTGAATTGCAGAATTCAGTGAATCATCGAATCTTTGAACGCACATTGCGCCCTCTGGCATTCCGGAGGGCATGCCTGTTCGAGCGTCATTACAACCCTCAAGCTCTGCTTGGTCTTGGGCTGGCCCGTCGGGGCCCGCCTGGAAATCAGTGGCGGCACTGCCCGACCCCTCAGCGGAGTACGTCCATTCTCGCTGCTGGG…
>Seq21	[organism=Lophodermella montivaga]	[isolate=NC8M]	internal transcribed spacer 1 partial sequence 5.8S ribosomal RNA gene complete sequence and internal transcribed spacer 2 partial sequence	MN937627
CGCCTGGTAAAACTCGCACCCTCTGTCTACCTTCTCTGTTGCTTTGGCAGGCCTCCGGCTCCGGCTGGGCCGCGCCTGCCAGGGGACCGAAACTCGTGAATCAGTGATGTCTGAGCACTATCTAATAGTTAAAAACTTTCAACAACGGATCTCTTGGTTCTGGCATCGATGAAGAACGCAGCGAAATGCGATAAGTAATGTGAATTGCAGAATTCAGTGAATCATCGAATCTTTGAACGCACATTGCGCCCTCTGGCATTCCGGAGGGCATGCCTGTTCGAGCGTCATTACAACCCTCAAGCTCTGCTTGGTCTTGGGCTGGCCCGTCGGGGCCCGCCTGGAAATCAGTGGCGGCACTGCCCGACCCCTCAGCGGAGTACGTCCATTCTCGCTGCTGGG…
>Seq22	[organism=Lophodermella montivaga]	[isolate=PT8M]	internal transcribed spacer 1 partial sequence 5.8S ribosomal RNA gene complete sequence and internal transcribed spacer 2 partial sequence	MN937628
CGCCTGGTAAAACTCGCACCCTCTGTCTACCTTCTCTGTTGCTTTGGCAGGCCTCCGGCTCCGGCTGGGCCGCGCCTGCCAGGGGACCGAAACTCGTGAATCAGTGATGTCTGAGCACTATCTAATAGTTAAAAACTTTCAACAACGGATCTCTTGGTTCTGGCATCGATGAAGAACGCAGCGAAATGCGATAAGTAATGTGAATTGCAGAATTCAGTGAATCATCGAATCTTTGAACGCACATTGCGCCCTCTGGCATTCCGGAGGGCATGCCTGTTCGAGCGTCATTACAACCCTCAAGCTCTGCTTGGTCTTGGGCTGGCCCGTCGGGGCCCGCCTGGAAATCAGTGGCGGCACTGCCCGACCCCTCAGCGGAGTACGTCCATTCTCGCTGCTGGG…
>Seq23	[organism=Lophodermella montivaga]	[isolate=TC9M]	internal transcribed spacer 1 partial sequence 5.8S ribosomal RNA gene complete sequence and internal transcribed spacer 2 partial sequence	MN937629
CGCCTGGTAAAACTCGCACCCTCTGTCTACCTTCTCTGTTGCTTTGGCAGGCCTCCGGCTCCGGCTGGGCCGCGCCTGCCAGGGGACCGAAACTCGTGAATCAGTGATGTCTGAGCACTATCTAATAGTTAAAAACTTTCAACAACGGATCTCTTGGTTCTGGCATCGATGAAGAACGCAGCGAAATGCGATAAGTAATGTGAATTGCAGAATTCAGTGAATCATCGAATCTTTGAACGCACATTGCGCCCTCTGGCATTCCGGAGGGCATGCCTGTTCGAGCGTCATTACAACCCTCAAGCTCTGCTTGGTCTTGGGCTGGCCCGTCGGGGCCCGCCTGGAAATCAGTGGCGGCACTGCCCGACCCCTCAGCGGAGTACGTCCATTCTCGCTGCTGGG…
>Seq24	[organism=Lophodermella montivaga]	[isolate=PT11M]	internal transcribed spacer 1 partial sequence 5.8S ribosomal RNA gene complete sequence and internal transcribed spacer 2 partial sequence	MN937630
CGCCTGGTAAAACTCGCACCCTCTGTCTACCTTCTCTGTTGCTTTGGCAGGCCTCCGGCTCCGGCTGGGCCGCGCCTGCCAGGGGACCGAAACTCGTGAATCAGTGATGTCTGAGCACTATCTAATAGTTAAAAACTTTCAACAACGGATCTCTTGGTTCTGGCATCGATGAAGAACGCAGCGAAATGCGATAAGTAATGTGAATTGCAGAATTCAGTGAATCATCGAATCTTTGAACGCACATTGCGCCCTCTGGCATTCCGGAGGGCATGCCTGTTCGAGCGTCATTACAACCCTCAAGCTCTGCTTGGTCTTGGGCTGGCCCGTCGGGGCCCGCCTGGAAATCAGTGGCGGCACTGCCCGACCCCTCAGCGGAGTACGTCCATTCTCGCTGCTGGG…
>Seq25	[organism=Lophodermella montivaga]	[isolate=TC1M]	internal transcribed spacer 1 partial sequence 5.8S ribosomal RNA gene complete sequence and internal transcribed spacer 2 partial sequence	MN937631
CGCCTGGTAAAACTCGCACCCTCTGTCTACCTTCTCTGTTGCTTTGGCAGGCCTCCGGCTCCGGCTGGGCCGCGCCTGCCAGGGGACCGAAACTCGTGAATCAGTGATGTCTGAGCACTATCTAATAGTTAAAAACTTTCAACAACGGATCTCTTGGTTCTGGCATCGATGAAGAACGCAGCGAAATGCGATAAGTAATGTGAATTGCAGAATTCAGTGAATCATCGAATCTTTGAACGCACATTGCGCCCTCTGGCATTCCGGAGGGCATGCCTGTTCGAGCGTCATTACAACCCTCAAGCTCTGCTTGGTCTTGGGCTGGCCCGTCGGGGCCCGCCTGGAAATCAGTGGCGGCACTGCCCGACCCCTCAGCGGAGTACGTCCATTCTCGCTGCTGGG…
>Seq26	[organism=Lophodermella montivaga]	[isolate=TC3M]	internal transcribed spacer 1 partial sequence 5.8S ribosomal RNA gene complete sequence and internal transcribed spacer 2 partial sequence	MN937632
CGCCTGGTAAAACTCGCACCCTCTGTCTACCTTCTCTGTTGCTTTGGCAGGCCTCCGGCTCCGGCTGGGCCGCGCCTGCCAGGGGACCGAAACTCGTGAATCAGTGATGTCTGAGCACTATCTAATAGTTAAAAACTTTCAACAACGGATCTCTTGGTTCTGGCATCGATGAAGAACGCAGCGAAATGCGATAAGTAATGTGAATTGCAGAATTCAGTGAATCATCGAATCTTTGAACGCACATTGCGCCCTCTGGCATTCCGGAGGGCATGCCTGTTCGAGCGTCATTACAACCCTCAAGCTCTGCTTGGTCTTGGGCTGGCCCGTCGGGGCCCGCCTGGAAATCAGTGGCGGCACTGCCCGACCCCTCAGCGGAGTACGTCCATTCTCGCTGCTGGG…
>Seq27	[organism=Lophodermella montivaga]	[isolate=CU1M]	internal transcribed spacer 1 partial sequence 5.8S ribosomal RNA gene complete sequence and internal transcribed spacer 2 partial sequence	MN937633
CGCCTGGTAAAACTCGCACCCTCTGTCTACCTTCTCTGTTGCTTTGGCAGGCCTCCGGCTCCGGCTGGGCCGCGCCTGCCAGGGGACCGAAACTCGTGAATCAGTGATGTCTGAGCACTATCTAATAGTTAAAAACTTTCAACAACGGATCTCTTGGTTCTGGCATCGATGAAGAACGCAGCGAAATGCGATAAGTAATGTGAATTGCAGAATTCAGTGAATCATCGAATCTTTGAACGCACATTGCGCCCTCTGGCATTCCGGAGGGCATGCCTGTTCGAGCGTCATTACAACCCTCAAGCTCTGCTTGGTCTTGGGCTGGCCCGTCGGGGCCCGCCTGGAAATCAGTGGCGGCACTGCCCGACCCCTCAGCGGAGTACGTCCATTCTCGCTGCTGGG…
>Seq28	[organism=Lophodermella montivaga]	[isolate=LVP2M]	internal transcribed spacer 1 partial sequence 5.8S ribosomal RNA gene complete sequence and internal transcribed spacer 2 partial sequence	MN937634
CGCCTGGTAAAACTCGCACCCTCTGTCTACCTTCTCTGTTGCTTTGGCAGGCCTCCGGCTCCGGCTGGGCCGCGCCTGCCAGGGGACCGAAACTCGTGAATCAGTGATGTCTGAGCACTATCTAATAGTTAAAAACTTTCAACAACGGATCTCTTGGTTCTGGCATCGATGAAGAACGCAGCGAAATGCGATAAGTAATGTGAATTGCAGAATTCAGTGAATCATCGAATCTTTGAACGCACATTGCGCCCTCTGGCATTCCGGAGGGCATGCCTGTTCGAGCGTCATTACAACCCTCAAGCTCTGCTTGGTCTTGGGCTGGCCCGTCGGGGCCCGCCTGGAAATCAGTGGCGGCACTGCCCGACCCCTCAGCGGAGTACGTCCATTCTCGCTGCTGGG…
>Seq29	[organism=Lophodermella montivaga]	[isolate=LVP3M]	internal transcribed spacer 1 partial sequence 5.8S ribosomal RNA gene complete sequence and internal transcribed spacer 2 partial sequence	MN937635
CGCCTGGTAAAACTCGCACCCTCTGTCTACCTTCTCTGTTGCTTTGGCAGGCCTCCGGCTCCGGCTGGGCCGCGCCTGCCAGGGGACCGAAACTCGTGAATCAGTGATGTCTGAGCACTATCTAATAGTTAAAAACTTTCAACAACGGATCTCTTGGTTCTGGCATCGATGAAGAACGCAGCGAAATGCGATAAGTAATGTGAATTGCAGAATTCAGTGAATCATCGAATCTTTGAACGCACATTGCGCCCTCTGGCATTCCGGAGGGCATGCCTGTTCGAGCGTCATTACAACCCTCAAGCTCTGCTTGGTCTTGGGCTGGCCCGTCGGGGCCCGCCTGGAAATCAGTGGCGGCACTGCCCGACCCCTCAGCGGAGTACGTCCATTCTCGCTGCTGGG…
>Seq30	[organism=Lophodermella montivaga]	[isolate=NC9M]	internal transcribed spacer 1 partial sequence 5.8S ribosomal RNA gene complete sequence and internal transcribed spacer 2 partial sequence	MN937636
CGCCTGGTAAAACTCGCACCCTCTGTCTACCTTCTCTGTTGCTTTGGCAGGCCTCCGGCTCCGGCTGGGCCGCGCCTGCCAGGGGACCGAAACTCGTGAATCAGTGATGTCTGAGCACTATCTAATAGTTAAAAACTTTCAACAACGGATCTCTTGGTTCTGGCATCGATGAAGAACGCAGCGAAATGCGATAAGTAATGTGAATTGCAGAATTCAGTGAATCATCGAATCTTTGAACGCACATTGCGCCCTCTGGCATTCCGGAGGGCATGCCTGTTCGAGCGTCATTACAACCCTCAAGCTCTGCTTGGTCTTGGGCTGGCCCGTCGGGGCCCGCCTGGAAATCAGTGGCGGCACTGCCCGACCCCTCAGCGGAGTACGTCCATTCTCGCTGCTGGG…
>Seq31	[organism=Lophodermella montivaga]	[isolate=NC10M]	internal transcribed spacer 1 partial sequence 5.8S ribosomal RNA gene complete sequence and internal transcribed spacer 2 partial sequence	MN937637
CGCCTGGTAAAACTCGCACCCTCTGTCTACCTTCTCTGTTGCTTTGGCAGGCCTCCGGCTCCGGCTGGGCCGCGCCTGCCAGGGGACCGAAACTCGTGAATCAGTGATGTCTGAGCACTATCTAATAGTTAAAAACTTTCAACAACGGATCTCTTGGTTCTGGCATCGATGAAGAACGCAGCGAAATGCGATAAGTAATGTGAATTGCAGAATTCAGTGAATCATCGAATCTTTGAACGCACATTGCGCCCTCTGGCATTCCGGAGGGCATGCCTGTTCGAGCGTCATTACAACCCTCAAGCTCTGCTTGGTCTTGGGCTGGCCCGTCGGGGCCCGCCTGGAAATCAGTGGCGGCACTGCCCGACCCCTCAGCGGAGTACGTCCATTCTCGCTGCTGGG…
>Seq32	[organism=Lophodermella montivaga]	[isolate=TL8M]	internal transcribed spacer 1 partial sequence 5.8S ribosomal RNA gene complete sequence and internal transcribed spacer 2 partial sequence	MN937638
CGCCTGGTAAAACTCGCACCCTCTGTCTACCTTCTCTGTTGCTTTGGCAGGCCTCCGGCTCCGGCTGGGCCGCGCCTGCCAGGGGACCGAAACTCGTGAATCAGTGATGTCTGAGCACTATCTAATAGTTAAAAACTTTCAACAACGGATCTCTTGGTTCTGGCATCGATGAAGAACGCAGCGAAATGCGATAAGTAATGTGAATTGCAGAATTCAGTGAATCATCGAATCTTTGAACGCACATTGCGCCCTCTGGCATTCCGGAGGGCATGCCTGTTCGAGCGTCATTACAACCCTCAAGCTCTGCTTGGTCTTGGGCTGGCCCGTCGGGGCCCGCCTGGAAATCAGTGGCGGCACTGCCCGACCCCTCAGCGGAGTACGTCCATTCTCGCTGCTGGG…
>Seq33	[organism=Lophodermella montivaga]	[isolate=TL9M]	internal transcribed spacer 1 partial sequence 5.8S ribosomal RNA gene complete sequence and internal transcribed spacer 2 partial sequence	MN937639
CGCCTGGTAAACTCGCACCCTCTGTCTACCTTCTCTGTTGCTTTGGCAGGCCTCCGGCTCCGGCTGGGCCGCGCCTGCCAGGGGACCGAAACTCGTGAATCAGTGATGTCTGAGCACTATCTAATAGTTAAAAACTTTCAACAACGGATCTCTTGGTTCTGGCATCGATGAAGAACGCAGCGAAATGCGATAAGTAATGTGAATTGCAGAATTCAGTGAATCATCGAATCTTTGAACGCACATTGCGCCCTCTGGCATTCCGGAGGGCATGCCTGTTCGAGCGTCATTACAACCCTCAAGCTCTGCTTGGTCTTGGGCTGGCCCGTCGGGGCCCGCCTGGAAATCAGTGGCGGCACTGCCCGACCCCTCAGCGGAGTACGTCCATTCTCGCTGCTGGGC…
>Seq34	[organism=Lophodermella montivaga]	[isolate=PT6M]	internal transcribed spacer 1 partial sequence 5.8S ribosomal RNA gene complete sequence and internal transcribed spacer 2 partial sequence	MN937640
CGCCTGGTAAACTCGCACCCTCTGTCTACCTTCTCTGTTGCTTTGGCAGGCCTCCGGCTCCGGCTGGGCCGCGCCTGCCAGGGGACCGAAACTCGTGAATCAGTGATGTCTGAGCACTATCTAATAGTTAAAAACTTTCAACAACGGATCTCTTGGTTCTGGCATCGATGAAGAACGCAGCGAAATGCGATAAGTAATGTGAATTGCAGAATTCAGTGAATCATCGAATCTTTGAACGCACATTGCGCCCTCTGGCATTCCGGAGGGCATGCCTGTTCGAGCGTCATTACAACCCTCAAGCTCTGCTTGGTCTTGGGCTGGCCCGTCGGGGCCCGCCTGGAAATCAGTGGCGGCACTGCCCGACCCCTCAGCGGAGTACGTCCATTCTCGCTGCTGGGC…
>Seq35	[organism=Lophodermella montivaga]	[isolate=OJ3M]	internal transcribed spacer 1 partial sequence 5.8S ribosomal RNA gene complete sequence and internal transcribed spacer 2 partial sequence	MN937641
CTCGCACCCTCTGTCTACCTTCTCTGTTGCTTTGGCAGGCCTCCGGCTCCGGCTGGGCCGCGCCTGCCAGGGGACCGAAACTCGTGAATCAGTGATGTCTGAGCACTATCTAATAGTTAAAAACTTTCAACAACGGATCTCTTGGTTCTGGCATCGATGAAGAACGCAGCGAAATGCGATAAGTAATGTGAATTGCAGAATTCAGTGAATCATCGAATCTTTGAACGCACATTGCGCCCTCTGGCATTCCGGAGGGCATGCCTGTTCGAGCGTCATTACAACCCTCAAGCTCTGCTTGGTCTTGGGCTGGCCCGTCGGGGCCCGCCTGGAAATCAGTGGCGGCACTGCCCGACCCCTCAGCGGAGTACGTCCATTCTCGCTGCTGGGCTCGGGCCACAG…
>Seq36	[organism=Lophodermella montivaga]	[isolate=PT9M]	internal transcribed spacer 1 partial sequence 5.8S ribosomal RNA gene complete sequence and internal transcribed spacer 2 partial sequence	MN937642
CTCGCACCCTCTGTCTACCTTCTCTGTTGCTTTGGCAGGCCTCCGGCTCCGGCTGGGCCGCGCCTGCCAGGGGACCGAAACTCGTGAATCAGTGATGTCTGAGCACTATCTAATAGTTAAAAACTTTCAACAACGGATCTCTTGGTTCTGGCATCGATGAAGAACGCAGCGAAATGCGATAAGTAATGTGAATTGCAGAATTCAGTGAATCATCGAATCTTTGAACGCACATTGCGCCCTCTGGCATTCCGGAGGGCATGCCTGTTCGAGCGTCATTACAACCCTCAAGCTCTGCTTGGTCTTGGGCTGGCCCGTCGGGGCCCGCCTGGAAATCAGTGGCGGCACTGCCCGACCCCTCAGCGGAGTACGTCCATTCTCGCTGCTGGGCTCGGGCCACAG…
>Seq37	[organism=Lophodermella montivaga]	[isolate=SR9M]	internal transcribed spacer 1 partial sequence 5.8S ribosomal RNA gene complete sequence and internal transcribed spacer 2 partial sequence	MN937643
AAACTCGCACCCTCTGTCTACCTTCTCTGTTGCTTTGGCAGGCCTCCGGCTCCGGCTGGGCCGCGCCTGCCAGGGGACCGAAACTCGTGAATCAGTGATGTCTGAGCACTATCTAATAGTTAAAAACTTTCAACAACGGATCTCTTGGTTCTGGCATCGATGAAGAACGCAGCGAAATGCGATAAGTAATGTGAATTGCAGAATTCAGTGAATCATCGAATCTTTGAACGCACATTGCGCCCTCTGGCATTCCGGAGGGCATGCCTGTTCGAGCGTCATTACAACCCTCAAGCTCTGCTTGGTCTTGGGCTGGCCCGTCGGGGCCCGCCTGGAAATCAGTGGCGGCACTGCCCGACCCCTCAGCGGAGTACGTCCATTCTCGCTGCTGGGCTCGGGCCA…
>Seq38	[organism=Lophodermella_arcuata]	[isolate=RMNP_LU1]	internal transcribed spacer 1 partial sequence 5.8S ribosomal RNA gene complete sequence and internal transcribed spacer 2 partial sequence	MN937644
AACCCGCCTGGTAACTCACACCTCTTGTCTACCCTCTCTGTTGCTTTGGCAGGCCTCCGGCTCCGGCTGGGCAGCGCCTGCCAGGGGACCTAAACTCGTGAATCAGTGATGTCTGAGCACTATCTAATAGTTAAAACTTTCAACAACGGATCTCTTGGTTCTGGCATCGATGAAGAACGCAGCGAAATGCGATAAGTAATGTGAATTGCAGAATTCAGTGAATCATCGAATCTTTGAACGCACATTGCGCCCTCTGGCATTCCGGAGGGCATGCCTGTTCGAGCGTCATTACAACCCTCAAGCTCTGCTTGGTCTTGGGCTGGCCCGGAAGGGCCAGCCTGGAAATCAGTGGCGGCACTGCCTGCCCCCTAAGCGTAGTACTTCCACTCTCGCTTCTGG…
>Seq39	[organism=Lophodermella sp.]	[isolate=RMNP_01]	internal transcribed spacer 1 partial sequence 5.8S ribosomal RNA gene complete sequence and internal transcribed spacer 2 partial sequence	MN937645
CCCGCCTGGTAACTCACACCCTTTGTCTACCTTCTCCGTTGCTTTGGCAGGCCTCCGGCTCCGGCTGGGCAGCGCCTGCCAGGGGACCTAAACTCGTGAATCAGTGATGTCTGAGCACTATCTAATAGTTAAAAACTTTCAACAACGGATCTCTTGGTTCTGGCATCGATGAAGAACGCAGCGAAATGCGATAAGTAATGTGAATTGCAGAATTCAGTGAATCATCGAATCTTTGAACGCACATTGCGCCCTCTGGCATTCCGGAGGGCATGCCTGTTCGAGCGTCATTACAACCCTCAAGCTCCGCTTGGTCTTGGGCTGGCCCTTTTGGGCCAGCCTGGAAATCAGTGGCGGCACTGCCCGACCCCTAAGCGGAGTACTTCCATTCTCGCTTCTGGG…
>Seq40	[organism=Lophodermella_arcuata]	[isolate=RMNP_LU16]	internal transcribed spacer 1 partial sequence 5.8S ribosomal RNA gene complete sequence and internal transcribed spacer 2 partial sequence	MT906333
CTCTTGTCTACCCTCTCTGTTGCTTTGGCAGGCCTCCGGCTCCGGCTGGGCAGCGCCTGCCAGGGGACCTAAACTCGTGAATCAGTGATGTCTGAGCACTATCTAATAGTTAAAACTTTCAACAACGGATCTCTTGGTTCTGGCATCGATGAAGAACGCAGCGAAATGCGATAAGTAATGTGAATTGCAGAATTCAGTGAATCATCGAATCTTTGAACGCACATTGCGCCCTCTGGCATTCCGGAGGGCATGCCTGTTCGAGCGTCATTACAACCCTCAAGCTCTGCTTGGTCTTGGGCTGGCCCGGAAGGGCCAGCCTGGAAATCAGTGGCGGCACTGCCTGCCCCCTAAGCGTAGTACTTCCACTCTCGCTTCTGGGCTTGGGCACCAGCCTGCCAG…

## Sheet: LSU_Sequences
Large subunit ribosomal RNA gene (LSU) sequences submitted to NCBI GenBank with their GenBank Accession Numbers
Sequence Number	Organism	Isolate_Number	Region	GenBank No.
>Seq1	[organism=Lophodermella concolor]	[isolate=OJ11C]	large subunit ribosomal RNA gene partial sequence	MN937574
GAACGGGACGTCATGGAGGGTGAGAATCCCGTATGTGACTGGTGGCCTGTGCCTGTGTGAAGCTCCTTCGACGAGTCGAGTTGTTTGGGAATGCAGCTCTAAATGGGTGGTAAATTTCATCTAAAGCTAAATACTGGCCAGAGACCGATAGCGCACAAGTAGAGTGATCGAAAGATGAAAAGCACTTTGGAAAGAGAGTTAAACAGTACGTGAAATTGTTGAAAGGGAAGCGCTTGCAATCAGACTTGCGCGGTGTTGATCAGCCTGGGTTCTCCCAGGTGCACTCAGCGCCGCTCAGGCCAGCATCAGTTTCGGCGGCGGGATAAAGGCCTGGGGAACGTAGGTCGCTTCGGCGACTGTTATAGCCCCAGGCGCCATGCCGCCTGCTGGGACTGAGGA…
>Seq2	[organism=Lophodermella concolor]	[isolate=LV7C]	large subunit ribosomal RNA gene partial sequence	MN937575
CGGAGGAAAAGAAACCAACAGGGATTGCCTCAGTAACGGCGAGTGAAGCGGCAAGAGCTCAAATTTGAAAGCTGGCTCCTCTGGGGCTCGCGTTGTAATTTGTAGAGGATGCTTCGGGCGCGGTGCCGGTCTAAGTTCCCTGGAACGGGACGTCATGGAGGGTGAGAATCCCGTATGTGACTGGTGGCCTGTGCCTGTGTGAAGCTCCTTCGACGAGTCGAGTTGTTTGGGAATGCAGCTCTAAATGGGTGGTAAATTTCATCTAAAGCTAAATACTGGCCAGAGACCGATAGCGCACAAGTAGAGTGATCGAAAGATGAAAAGCACTTTGGAAAGAGAGTTAAACAGTACGTGAAATTGTTGAAAGGGAAGCGCTTGCAATCAGACTTGCGCGGTGTT…
>Seq3	[organism=Lophodermella concolor]	[isolate=LV8C]	large subunit ribosomal RNA gene partial sequence	MN937576
CGGAGGAAAAGAAACCAACAGGGATTGCCTCAGTAACGGCGAGTGAAGCGGCAAGAGCTCAAATTTGAAAGCTGGCTCCTCTGGGGCTCGCGTTGTAATTTGTAGAGGATGCTTCGGGCGCGGTGCCGGTCTAAGTTCCCTGGAACGGGACGTCATGGAGGGTGAGAATCCCGTATGTGACTGGTGGCCTGTGCCTGTGTGAAGCTCCTTCGACGAGTCGAGTTGTTTGGGAATGCAGCTCTAAATGGGTGGTAAATTTCATCTAAAGCTAAATACTGGCCAGAGACCGATAGCGCACAAGTAGAGTGATCGAAAGATGAAAAGCACTTTGGAAAGAGAGTTAAACAGTACGTGAAATTGTTGAAAGGGAAGCGCTTGCAATCAGACTTGCGCGGTGTT…
>Seq4	[organism=Lophodermella concolor]	[isolate=PT2C]	large subunit ribosomal RNA gene partial sequence	MN937577
GCTCAAATTTGAAAGCTGGCTCCTCTGGGGCTCGCGTTGTAATTTGTAGAGGATGCTTCGGGCGCGGTGCCGGTCTAAGTTCCCTGGAACGGGACGTCATGGAGGGTGAGAATCCCGTATGTGACTGGTGGCCTGTGCCTGTGTGAAGCTCCTTCGACGAGTCGAGTTGTTTGGGAATGCAGCTCTAAATGGGTGGTAAATTTCATCTAAAGCTAAATACTGGCCAGAGACCGATAGCGCACAAGTAGAGTGATCGAAAGATGAAAAGCACTTTGGAAAGAGAGTTAAACAGTACGTGAAATTGTTGAAAGGGAAGCGCTTGCAATCAGACTTGCGCGGTGTTGATCAGCCTGGGTTCTCCCAGGTGCACTCAGCGCCGCTCAGGCCAGCATCAGTTTC…
>Seq5	[organism=Lophodermella concolor]	[isolate=SR3C]	large subunit ribosomal RNA gene partial sequence	MN937578
TGCCTCAGTAACGGCGAGTGAAGCGGCAAGAGCTCAAATTTGAAAGCTGGCTCCTCTGGGGCTCGCGTTGTAATTTGTAGAGGATGCTTCGGGCGCGGTGCCGGTCTAAGTTCCCTGGAACGGGACGTCATGGAGGGTGAGAATCCCGTATGTGACTGGTGGCCTGTGCCTGTGTGAAGCTCCTTCGACGAGTCGAGTTGTTTGGGAATGCAGCTCTAAATGGGTGGTAAATTTCATCTAAAGCTAAATACTGGCCAGAGACCGATAGCGCACAAGTAGAGTGATCGAAAGATGAAAAGCACTTTGGAAAGAGAGTTAAACAGTACGTGAAATTGTTGAAAGGGAAGCGCTTGCAATCAGACTTGCGCGGTGTTGATCAGCCTGGGTTCTCCCAGGTGC…
>Seq6	[organism=Lophodermella concolor]	[isolate=CS9C]	large subunit ribosomal RNA gene partial sequence	MN937579
GAAGCGGCAAGAGCTCAAATTTGAAAGCTGGCTCCTCTGGGGCTCGCGTTGTAATTTGTAGAGGATGCTTCGGGCGCGGTGCCGGTCTAAGTTCCCTGGAACGGGACGTCATGGAGGGTGAGAATCCCGTATGTGACTGGTGGCCTGTGCCTGTGTGAAGCTCCTTCGACGAGTCGAGTTGTTTGGGAATGCAGCTCTAAATGGGTGGTAAATTTCATCTAAAGCTAAATACTGGCCAGAGACCGATAGCGCACAAGTAGAGTGATCGAAAGATGAAAAGCACTTTGGAAAGAGAGTTAAACAGTACGTGAAATTGTTGAAAGGGAAGCGCTTGCAATCAGACTTGCGCGGTGTTGATCAGCCTGGGTTCTCCCAGGTGCACTCAGCGCCGCTCAGGCC…
>Seq7	[organism=Lophodermella concolor]	[isolate=FS8C]	large subunit ribosomal RNA gene partial sequence	MN937580
AGCGGCAAGAGCTCAAATTTGAAAGCTGGCTCCTCTGGGGCTCGCGTTGTAATTTGTAGAGGATGCTTCGGGCGCGGTGCCGGTCTAAGTTCCCTGGAACGGGACGTCATGGAGGGTGAGAATCCCGTATGTGACTGGTGGCCTGTGCCTGTGTGAAGCTCCTTCGACGAGTCGAGTTGTTTGGGAATGCAGCTCTAAATGGGTGGTAAATTTCATCTAAAGCTAAATACTGGCCAGAGACCGATAGCGCACAAGTAGAGTGATCGAAAGATGAAAAGCACTTTGGAAAGAGAGTTAAACAGTACGTGAAATTGTTGAAAGGGAAGCGCTTGCAATCAGACTTGCGCGGTGTTGATCAGCCTGGGTTCTCCCAGGTGCACTCAGCGCCGCTCAGGCCAG…
>Seq8	[organism=Lophodermella concolor]	[isolate=CS6C]	large subunit ribosomal RNA gene partial sequence	MN937581
ACGGCGAGTGAAGCGGCAAGAGCTCAAATTTGAAAGCTGGCTCCTCTGGGGCTCGCGTTGTAATTTGTAGAGGATGCTTCGGGCGCGGTGCCGGTCTAAGTTCCCTGGAACGGGACGTCATGGAGGGTGAGAATCCCGTATGTGACTGGTGGCCTGTGCCTGTGTGAAGCTCCTTCGACGAGTCGAGTTGTTTGGGAATGCAGCTCTAAATGGGTGGTAAATTTCATCTAAAGCTAAATACTGGCCAGAGACCGATAGCGCACAAGTAGAGTGATCGAAAGATGAAAAGCACTTTGGAAAGAGAGTTAAACAGTACGTGAAATTGTTGAAAGGGAAGCGCTTGCAATCAGACTTGCGCGGTGTTGATCAGCCTGGGTTCTCCCAGGTGCACTCAGCGCC…
>Seq9	[organism=Lophodermella concolor]	[isolate=FS6C]	large subunit ribosomal RNA gene partial sequence	MN937582
AACGGCGAGTGAAGCGGCAAGAGCTCAAATTTGAAAGCTGGCTCCTCTGGGGCTCGCGTTGTAATTTGTAGAGGATGCTTCGGGCGCGGTGCCGGTCTAAGTTCCCTGGAACGGGACGTCATGGAGGGTGAGAATCCCGTATGTGACTGGTGGCCTGTGCCTGTGTGAAGCTCCTTCGACGAGTCGAGTTGTTTGGGAATGCAGCTCTAAATGGGTGGTAAATTTCATCTAAAGCTAAATACTGGCCAGAGACCGATAGCGCACAAGTAGAGTGATCGAAAGATGAAAAGCACTTTGGAAAGAGAGTTAAACAGTACGTGAAATTGTTGAAAGGGAAGCGCTTGCAATCAGACTTGCGCGGTGTTGATCAGCCTGGGTTCTCCCAGGTGCACTCAGCGC…
>Seq10	[organism=Lophodermella concolor]	[isolate=PT3C]	large subunit ribosomal RNA gene partial sequence	MN937583
TCTGGGGCTCGCGTTGTAATTTGTAGAGGATGCTTCGGGCGCGGTGCCGGTCTAAGTTCCCTGGAACGGGACGTCATGGAGGGTGAGAATCCCGTATGTGACTGGTGGCCTGTGCCTGTGTGAAGCTCCTTCGACGAGTCGAGTTGTTTGGGAATGCAGCTCTAAATGGGTGGTAAATTTCATCTAAAGCTAAATACTGGCCAGAGACCGATAGCGCACAAGTAGAGTGATCGAAAGATGAAAAGCACTTTGGAAAGAGAGTTAAACAGTACGTGAAATTGTTGAAAGGGAAGCGCTTGCAATCAGACTTGCGCGGTGTTGATCAGCCTGGGTTCTCCCAGGTGCACTCAGCGCCGCTCAGGCCAGCATCAGTTTCGGCGGCGGGATAAAGGCCTGGGG…
>Seq11	[organism=Lophodermella concolor]	[isolate=SR6C]	large subunit ribosomal RNA gene partial sequence	MN937584
AAGCTGGCTCCTCTGGGGCTCGCGTTGTAATTTGTAGAGGATGCTTCGGGCGCGGTGCCGGTCTAAGTTCCCTGGAACGGGACGTCATGGAGGGTGAGAATCCCGTATGTGACTGGTGGCCTGTGCCTGTGTGAAGCTCCTTCGACGAGTCGAGTTGTTTGGGAATGCAGCTCTAAATGGGTGGTAAATTTCATCTAAAGCTAAATACTGGCCAGAGACCGATAGCGCACAAGTAGAGTGATCGAAAGATGAAAAGCACTTTGGAAAGAGAGTTAAACAGTACGTGAAATTGTTGAAAGGGAAGCGCTTGCAATCAGACTTGCGCGGTGTTGATCAGCCTGGGTTCTCCCAGGTGCACTCAGCGCCGCTCAGGCCAGCATCAGTTTCGGCGGCGGGATA…
>Seq12	[organism=Lophodermella arcuata]	[isolate=RMNP_LU1]	large subunit ribosomal RNA gene partial sequence	MN937585
GTGAAGCGGCAACAGCTCAAATTTGAAAGCTGGCTCCTCACGGGGCCCGCGTTGTAATTTGTAGAGGATGCTTCGGGCGCGGCGCCGGTCTAAGTTCTCTGGAACGAGACGTCACAGAGGGTGAGAATCCCGTATGCGACTGGTGGCCTGGGTTCATGTGAAGCTCCTTCGACGAGTCGAGTTGTTTGGGAATGCAGCTCTAAATGGGTGGTACACTCCATCTAAGGCTAAATACTGGCCAGAGACCGATAGCGCACAAGTAGAGTGATCGAAAGATGAAAAGCACTTTGGAAAGAGAGTTAAACAGTACGTGAAATTGTTGAAAGGGAAGCGCTTGCAATCAGACTTGCGCCGCGGTGATCAGCCTGGGTTCTCCCAGGTGCACTCAGCGCGGCTCAG…
>Seq13	[organism=Lophodermella montivaga]	[isolate=CU1M]	large subunit ribosomal RNA gene partial sequence	MN937586
AATTTGAAAGCTGGCTCCTCTCGGGGCCCGCGTTGTAATTTGTAGAGGATGCTTCGGGCGCGGCGCCGGTCTAAGTTCTCTGGAACGAGACGTCATGGAGGGTGAGAATCCCGTATGCGACTGGTGGCCTGGGTTCATGTGAAGCTCCTTCGACGAGTCGAGTTGTTTGGGAATGCAGCTCTAAATGGGTGGTACACTCCATCTAAGGCTAAATACTGGCCAGAGACCGATAGCGCACAAGTAGAGTGATCGAAAGATGAAAAGCACTTTGGAAAGAGAGTTAAACAGTACGTGAAATTGTTGAAAGGGAAGCGCTTGCAATCAGACTTGCGCCGCGTTGATCAGCCCGGGTTCTCCCGGGTGCACTCAGCGCGGCTCAGGCCAGCATCAGTTCTGGCG…
>Seq14	[organism=Lophodermella montivaga]	[isolate=PT9M]	large subunit ribosomal RNA gene partial sequence	MN937587
TCGGGGCCCGCGTTGTAATTTGTAGAGGATGCTTCGGGCGCGGCGCCGGTCTAAGTTCTCTGGAACGAGACGTCATGGAGGGTGAGAATCCCGTATGCGACTGGTGGCCTGGGTTCATGTGAAGCTCCTTCGACGAGTCGAGTTGTTTGGGAATGCAGCTCTAAATGGGTGGTACACTCCATCTAAGGCTAAATACTGGCCAGAGACCGATAGCGCACAAGTAGAGTGATCGAAAGATGAAAAGCACTTTGGAAAGAGAGTTAAACAGTACGTGAAATTGTTGAAAGGGAAGCGCTTGCAATCAGACTTGCGCCGCGTTGATCAGCCCGGGTTCTCCCGGGTGCACTCAGCGCGGCTCAGGCCAGCATCAGTTCTGGCGGTGGGATAAAGGCCCAGGGA…
>Seq15	[organism=Lophodermella concolor]	[isolate=LP7C]	large subunit ribosomal RNA gene partial sequence	MN937588
GCGGAGGAAAAGAAACCAACAGGGATTGCCTCAGTAACGGCGAGTGAAGCGGCAAGAGCTCAAATTTGAAAGCTGGCTCCTCTGGGGCTCGCGTTGTAATTTGTAGAGGATGCTTCGGGCGCGGTGCCGGTCTAAGTTCCCTGGAACGGGACGTCATGGAGGGTGAGAATCCCGTATGTGACTGGTGGCCTGTGCCTGTGTGAAGCTCCTTCGACGAGTCGAGTTGTTTGGGAATGCAGCTCTAAATGGGTGGTAAATTTCATCTAAAGCTAAATACTGGCCAGAGACCGATAGCGCACAAGTAGAGTGATCGAAAGATGAAAAGCACTTTGGAAAGAGAGTTAAACAGTACGTGAAATTGTTGAAAGGGAAGCGCTTGCAATCAGACTTGCGCGGTGT…
>Seq16	[organism=Lophophacidium dooksii]	[isolate=MB5]	large subunit ribosomal RNA gene partial sequence	MN937589
TAACGGCGAGTGAAGCGGCAACAGCTCAAATTTGAAAGCTGGCTCCTCTCGGGGCCCGCGTTGTAATTTGTAGAGGATGCTTCGGGCGCGGCGCCGGTCCAAGTTCTCTGGAACGAGACGTCATAGAGGGTGAGAATCCCGTATGCGGCTGGTGGCCTGGGCTCATGTGAAGCTCCTTCGACGAGTCGAGTTGTTTGGGAATGCAGCTCTAAATGGGTGGTACATTCCATCTAAGGCTAAATACTGGCCAGAGACCGATAGCGCACAAGTAGAGTGATCGAAAGATGAAAAGCACTTTGGAAAGAGAGTTAAACAGTACGTGAAATTGTTGAAAGGGAAGCGCTTGCAATCAGACTTGCGCCGCGTTGATCAGCCTGGGTTCTCCCAGGTGCACTCAGC…
>Seq17	[organism=Lophodermella sp.]	[isolate=RMNP_01]	large subunit ribosomal RNA gene partial sequence	MN937590
TAACGGCGAGTGAAGCGGCAACAGCTCAAATTTGAAAGCTGGCTCCTCTCGGGGCCCGCGTTGTAATTTGTAGAGGATGCTTCGGGCGCGGCGCCGGTCTAAGTTCTCTGGAACGAGACGTCATAGAGGGTGAGAATCCCGTATGCGACTGGTGGCCTGGGCTCATGTGAAGCTCCTTCGACGAGTCGAGTTGTTTGGGAATGCAGCTCTAAATGGGTGGTACATTCCATCTAAGGCTAAATACTGGCCAGAGACCGATAGCGCACAAGTAGAGTGATCGAAAGATGAAAAGCACTTTGGAAAGAGAGTTAAACAGTACGTGAAATTGTTGAAAGGGAAGCGCTTGCAATCAGACTTGCGCCGCGTTGATCAGCCTGGGTTCTCCCAGGTGCACTCAGC…
>Seq18	[organism=Lophodermella montivaga]	[isolate=PT10M]	large subunit ribosomal RNA gene partial sequence	MN937591
GGCGAGTGAAGCGGCAACAGCTCAAATTTGAAAGCTGGCTCCTCTCGGGGCCCGCGTTGTAATTTGTAGAGGATGCTTCGGGCGCGGCGCCGGTCTAAGTTCTCTGGAACGAGACGTCATGGAGGGTGAGAATCCCGTATGCGACTGGTGGCCTGGGTTCATGTGAAGCTCCTTCGACGAGTCGAGTTGTTTGGGAATGCAGCTCTAAATGGGTGGTACACTCCATCTAAGGCTAAATACTGGCCAGAGACCGATAGCGCACAAGTAGAGTGATCGAAAGATGAAAAGCACTTTGGAAAGAGAGTTAAACAGTACGTGAAATTGTTGAAAGGGAAGCGCTTGCAATCAGACTTGCGCCGCGTTGATCAGCCCGGGTTCTCCCGGGTGCACTCAGCGCGG…
>Seq19	[organism=Lophodermella montivaga]	[isolate=NC2M]	large subunit ribosomal RNA gene partial sequence	MN937592
TTGCCTCAGTAACGGCGAGTGAAGCGGCAACAGCTCAAATTTGAAAGCTGGCTCCTCTCGGGGCCCGCGTTGTAATTTGTAGAGGATGCTTCGGGCGCGGCGCCGGTCTAAGTTCTCTGGAACGAGACGTCATGGAGGGTGAGAATCCCGTATGCGACTGGTGGCCTGGGTTCATGTGAAGCTCCTTCGACGAGTCGAGTTGTTTGGGAATGCAGCTCTAAATGGGTGGTACACTCCATCTAAGGCTAAATACTGGCCAGAGACCGATAGCGCACAAGTAGAGTGATCGAAAGATGAAAAGCACTTTGGAAAGAGAGTTAAACAGTACGTGAAATTGTTGAAAGGGAAGCGCTTGCAATCAGACTTGCGCCGCGTTGATCAGCCCGGGTTCTCCCGGGT…
>Seq20	[organism=Lophodermella montivaga]	[isolate=NC8M]	large subunit ribosomal RNA gene partial sequence	MN937593
TGCCTCAGTAACGGCGAGTGAAGCGGCAACAGCTCAAATTTGAAAGCTGGCTCCTCTCGGGGCCCGCGTTGTAATTTGTAGAGGATGCTTCGGGCGCGGCGCCGGTCTAAGTTCTCTGGAACGAGACGTCATGGAGGGTGAGAATCCCGTATGCGACTGGTGGCCTGGGTTCATGTGAAGCTCCTTCGACGAGTCGAGTTGTTTGGGAATGCAGCTCTAAATGGGTGGTACACTCCATCTAAGGCTAAATACTGGCCAGAGACCGATAGCGCACAAGTAGAGTGATCGAAAGATGAAAAGCACTTTGGAAAGAGAGTTAAACAGTACGTGAAATTGTTGAAAGGGAAGCGCTTGCAATCAGACTTGCGCCGCGTTGATCAGCCCGGGTTCTCCCGGGTG…
>Seq21	[organism=Lophodermella montivaga]	[isolate=PT6M]	large subunit ribosomal RNA gene partial sequence	MN937594
TGCCTCAGTAACGGCGAGTGAAGCGGCAACAGCTCAAATTTGAAAGCTGGCTCCTCTCGGGGCCCGCGTTGTAATTTGTAGAGGATGCTTCGGGCGCGGCGCCGGTCTAAGTTCTCTGGAACGAGACGTCATGGAGGGTGAGAATCCCGTATGCGACTGGTGGCCTGGGTTCATGTGAAGCTCCTTCGACGAGTCGAGTTGTTTGGGAATGCAGCTCTAAATGGGTGGTACACTCCATCTAAGGCTAAATACTGGCCAGAGACCGATAGCGCACAAGTAGAGTGATCGAAAGATGAAAAGCACTTTGGAAAGAGAGTTAAACAGTACGTGAAATTGTTGAAAGGGAAGCGCTTGCAATCAGACTTGCGCCGCGTTGATCAGCCCGGGTTCTCCCGGGTG…
>Seq22	[organism=Lophodermella montivaga]	[isolate=PT11M]	large subunit ribosomal RNA gene partial sequence	MN937595
TGCCTCAGTAACGGCGAGTGAAGCGGCAACAGCTCAAATTTGAAAGCTGGCTCCTCTCGGGGCCCGCGTTGTAATTTGTAGAGGATGCTTCGGGCGCGGCGCCGGTCTAAGTTCTCTGGAACGAGACGTCATGGAGGGTGAGAATCCCGTATGCGACTGGTGGCCTGGGTTCATGTGAAGCTCCTTCGACGAGTCGAGTTGTTTGGGAATGCAGCTCTAAATGGGTGGTACACTCCATCTAAGGCTAAATACTGGCCAGAGACCGATAGCGCACAAGTAGAGTGATCGAAAGATGAAAAGCACTTTGGAAAGAGAGTTAAACAGTACGTGAAATTGTTGAAAGGGAAGCGCTTGCAATCAGACTTGCGCCGCGTTGATCAGCCCGGGTTCTCCCGGGTG…
>Seq23	[organism=Lophodermella montivaga]	[isolate=TC1M]	large subunit ribosomal RNA gene partial sequence	MN937596
TGCCTCAGTAACGGCGAGTGAAGCGGCAACAGCTCAAATTTGAAAGCTGGCTCCTCTCGGGGCCCGCGTTGTAATTTGTAGAGGATGCTTCGGGCGCGGCGCCGGTCTAAGTTCTCTGGAACGAGACGTCATGGAGGGTGAGAATCCCGTATGCGACTGGTGGCCTGGGTTCATGTGAAGCTCCTTCGACGAGTCGAGTTGTTTGGGAATGCAGCTCTAAATGGGTGGTACACTCCATCTAAGGCTAAATACTGGCCAGAGACCGATAGCGCACAAGTAGAGTGATCGAAAGATGAAAAGCACTTTGGAAAGAGAGTTAAACAGTACGTGAAATTGTTGAAAGGGAAGCGCTTGCAATCAGACTTGCGCCGCGTTGATCAGCCCGGGTTCTCCCGGGTG…
>Seq24	[organism=Lophodermella montivaga]	[isolate=TC3M]	large subunit ribosomal RNA gene partial sequence	MN937597
TGCCTCAGTAACGGCGAGTGAAGCGGCAACAGCTCAAATTTGAAAGCTGGCTCCTCTCGGGGCCCGCGTTGTAATTTGTAGAGGATGCTTCGGGCGCGGCGCCGGTCTAAGTTCTCTGGAACGAGACGTCATGGAGGGTGAGAATCCCGTATGCGACTGGTGGCCTGGGTTCATGTGAAGCTCCTTCGACGAGTCGAGTTGTTTGGGAATGCAGCTCTAAATGGGTGGTACACTCCATCTAAGGCTAAATACTGGCCAGAGACCGATAGCGCACAAGTAGAGTGATCGAAAGATGAAAAGCACTTTGGAAAGAGAGTTAAACAGTACGTGAAATTGTTGAAAGGGAAGCGCTTGCAATCAGACTTGCGCCGCGTTGATCAGCCCGGGTTCTCCCGGGTG…
>Seq25	[organism=Lophodermella montivaga]	[isolate=LVP3M]	large subunit ribosomal RNA gene partial sequence	MN937598
TTGCCTCAGTAACGGCGAGTGAAGCGGCAACAGCTCAAATTTGAAAGCTGGCTCCTCTCGGGGCCCGCGTTGTAATTTGTAGAGGATGCTTCGGGCGCGGCGCCGGTCTAAGTTCTCTGGAACGAGACGTCATGGAGGGTGAGAATCCCGTATGCGACTGGTGGCCTGGGTTCATGTGAAGCTCCTTCGACGAGTCGAGTTGTTTGGGAATGCAGCTCTAAATGGGTGGTACACTCCATCTAAGGCTAAATACTGGCCAGAGACCGATAGCGCACAAGTAGAGTGATCGAAAGATGAAAAGCACTTTGGAAAGAGAGTTAAACAGTACGTGAAATTGTTGAAAGGGAAGCGCTTGCAATCAGACTTGCGCCGCGTTGATCAGCCCGGGTTCTCCCGGGT…
>Seq26	[organism=Lophodermella montivaga]	[isolate=TC9M]	large subunit ribosomal RNA gene partial sequence	MN937599
TTGCCTCAGTAACGGCGAGTGAAGCGGCAACAGCTCAAATTTGAAAGCTGGCTCCTCTCGGGGCCCGCGTTGTAATTTGTAGAGGATGCTTCGGGCGCGGCGCCGGTCTAAGTTCTCTGGAACGAGACGTCATGGAGGGTGAGAATCCCGTATGCGACTGGTGGCCTGGGTTCATGTGAAGCTCCTTCGACGAGTCGAGTTGTTTGGGAATGCAGCTCTAAATGGGTGGTACACTCCATCTAAGGCTAAATACTGGCCAGAGACCGATAGCGCACAAGTAGAGTGATCGAAAGATGAAAAGCACTTTGGAAAGAGAGTTAAACAGTACGTGAAATTGTTGAAAGGGAAGCGCTTGCAATCAGACTTGCGCCGCGTTGATCAGCCCGGGTTCTCCCGGGT…
>Seq27	[organism=Lophodermella montivaga]	[isolate=TL8M]	large subunit ribosomal RNA gene partial sequence	MN937600
TGCCTCAGTAACGGCGAGTGAAGCGGCAACAGCTCAAATTTGAAAGCTGGCTCCTCTCGGGGCCCGCGTTGTAATTTGTAGAGGATGCTTCGGGCGCGGCGCCGGTCTAAGTTCTCTGGAACGAGACGTCATGGAGGGTGAGAATCCCGTATGCGACTGGTGGCCTGGGTTCATGTGAAGCTCCTTCGACGAGTCGAGTTGTTTGGGAATGCAGCTCTAAATGGGTGGTACACTCCATCTAAGGCTAAATACTGGCCAGAGACCGATAGCGCACAAGTAGAGTGATCGAAAGATGAAAAGCACTTTGGAAAGAGAGTTAAACAGTACGTGAAATTGTTGAAAGGGAAGCGCTTGCAATCAGACTTGCGCCGCGTTGATCAGCCCGGGTTCTCCCGGGTG…
>Seq28	[organism=Lophodermella montivaga]	[isolate=NC6M]	large subunit ribosomal RNA gene partial sequence	MN937601
TTGCCTCAGTAACGGCGAGTGAAGCGGCAACAGCTCAAATTTGAAAGCTGGCTCCTCTCGGGGCCCGCGTTGTAATTTGTAGAGGATGCTTCGGGCGCGGCGCCGGTCTAAGTTCTCTGGAACGAGACGTCATGGAGGGTGAGAATCCCGTATGCGACTGGTGGCCTGGGTTCATGTGAAGCTCCTTCGACGAGTCGAGTTGTTTGGGAATGCAGCTCTAAATGGGTGGTACACTCCATCTAAGGCTAAATACTGGCCAGAGACCGATAGCGCACAAGTAGAGTGATCGAAAGATGAAAAGCACTTTGGAAAGAGAGTTAAACAGTACGTGAAATTGTTGAAAGGGAAGCGCTTGCAATCAGACTTGCGCCGCGTTGATCAGCCCGGGTTCTCCCGGGT…
>Seq29	[organism=Lophodermella montivaga]	[isolate=PT8M]	large subunit ribosomal RNA gene partial sequence	MN937602
TTGCCTCAGTAACGGCGAGTGAAGCGGCAACAGCTCAAATTTGAAAGCTGGCTCCTCTCGGGGCCCGCGTTGTAATTTGTAGAGGATGCTTCGGGCGCGGCGCCGGTCTAAGTTCTCTGGAACGAGACGTCATGGAGGGTGAGAATCCCGTATGCGACTGGTGGCCTGGGTTCATGTGAAGCTCCTTCGACGAGTCGAGTTGTTTGGGAATGCAGCTCTAAATGGGTGGTACACTCCATCTAAGGCTAAATACTGGCCAGAGACCGATAGCGCACAAGTAGAGTGATCGAAAGATGAAAAGCACTTTGGAAAGAGAGTTAAACAGTACGTGAAATTGTTGAAAGGGAAGCGCTTGCAATCAGACTTGCGCCGCGTTGATCAGCCCGGGTTCTCCCGGGT…
>Seq30	[organism=Lophodermella conjuncta]	[isolate=_PHP19_0987]	large subunit ribosomal RNA gene partial sequence	MN937603
TCAATAAGCGGAGGAAAAGAAACCAACAGGGATTGCCTCAGTAACGGCGAGTGAAGCGGCAACAGCTCAAATTTGAAAGCTGGCTCCTTCGGGGCCCGCGTTGTAATTTGTAGAGGACGCTTCGGGTGCGGCACCGGTCTAAGTTCTTTGGAACAAGACGTCAGAGAGGGTGAGAATCCCGTACGTGACTGGCTGCCTGCGCCCATGTGTAGCTCCTTCGACGAGTCGAGTTGTTTGGGAATGCAGCTCAAAATGGGAGGTGTACTCCTTCTAAAGCTAAATATTGGCCAGAGACCGATAGCGCACAAGTAGAGTGATCGAAAGATGAAAAGCACTTTGGAAAGAGAGTTAAACAGTACGTGAAATTGTTGAAAGGGAAGCGCTTGCAATCAGACTTGC…
>Seq31	[organism=Lophodermella sulcigena]	[isolate=PH18_0656]	large subunit ribosomal RNA gene partial sequence	MN937604
AGCATATCATAAGCGGAGGAAAAGAAACCAACAGGGATTGCCTCAGTAACGGCGAGTGAAGCGGCAACAGCTCAAATTTGAAAGCTGGCTCCTCTCGGGGCCCGCGTTGTAATTTGTAGAGGATGCTTCGGGCGCGGCGCCGGTCTAAGTTCTCTGGAACGAGATGTCATGGAGGGTGAGAATCCCGTATGCGACTGGTGGCCTGGGTTCATGTGAAGCTCCTTCGACGAGTCGAGTTGTTTGGGAATGCAGCTCTAAATGGGTGGTACACTCCATCTAAGGCTAAATACTGGCCAGAGACCGATAGCGCACAAGTAGAGTGATCGAAAGATGAAAAGCACTTTGGAAAGAGAGTTAAACAGTACGTGAAATTGTTGAAAGGGAAGCGCTTGCAATCAG…
>Seq32	[organism=Lophodermella conjuncta]	[isolate=PH18_0655]	large subunit ribosomal RNA gene partial sequence	MN937605
TCAATAAGCGGAGGAAAAGAAACCAACAGGGATTGCCTCAGTAACGGCGAGTGAAGCGGCAACAGCTCAAATTTGAAAGCTGGCTCCTTCGGGGCCCGCGTTGTAATTTGTAGAGGACGCTTCGGGTGCGGCACCGGTCTAAGTTCTTTGGAACAAGACGTCAGAGAGGGTGAGAATCCCGTACGTGACTGGCTGCCTGCGCCCATGTGTAGCTCCTTCGACGAGTCGAGTTGTTTGGGAATGCAGCTCAAAATGGGAGGTGTACTCCTTCTAAAGCTAAATATTGGCCAGAGACCGATAGCGCACAAGTAGAGTGATCGAAAGATGAAAAGCACTTTGGAAAGAGAGTTAAACAGTACGTGAAATTGTTGAAAGGGAAGCGCTTGCAATCAGACTTGC…
>Seq33	[organism=Lophodermella conjuncta]	[isolate=PHP19_0986]	large subunit ribosomal RNA gene partial sequence	MN937606
GGGATTGCCTCAGTAACGGCGAGTGAAGCGGCAACAGCTCAAATTTGAAAGCTGGCTCCTTCGGGGCCCGCGTTGTAATTTGTAGAGGACGCTTCGGGTGCGGCACCGGTCTAAGTTCTTTGGAACAAGACGTCAGAGAGGGTGAGAATCCCGTACGTGACTGGCTGCCTGCGCCCATGTGTAGCTCCTTCGACGAGTCGAGTTGTTTGGGAATGCAGCTCAAAATGGGAGGTGTACTCCTTCTAAAGCTAAATATTGGCCAGAGACCGATAGCGCACAAGTAGAGTGATCGAAAGATGAAAAGCACTTTGGAAAGAGAGTTAAACAGTACGTGAAATTGTTGAAAGGGAAGCGCTTGCAATCAGACTTGCGCGGCGTCGATCAGCCCGGGCTCGTCCC…
>Seq34	[organism=Lophodermella montivaga]	[isolate=LVP2M]	large subunit ribosomal RNA gene partial sequence	MT906358
GGTTCCCACCTCCGTTCACTTTCATTGCGCGGATGGGTTTGACACCCAAACACTCGCATCACTGTAAGACTCCTTGGTCCGTGTTTCAAGACGGGTCGCTTACAACCATTACGCCAGCATCCTAGCCGGAGCGCGGTCCTCAGTCCCGGCAGGCGGCATGGCACCCAGGGCTATAACAGATGCCGGGGCGTCCTACATTCCCTGGGCCTTTATCCCACCGCCAGAACTGATGCTGGCCTGAGCCGCGCTGAGTGCACCCGGGAGAACCCGGGCTGATCAACGCGGCGCAAGTCTGATTGCAAGCGCTTCCCTTTCAACAATTTCACGTACTGTTTAACTCTCTTTCCAAAGTGCTTTTCATCTTTCGATCACTCTACTTGTGCGCTATCGGTCTCTGGC…
>Seq35	[organism=Lophodermella arcuata]	[isolate=RMNP_LU16]	large subunit ribosomal RNA gene partial sequence	MT906359
TCTTTCGCCCCTATACGCAACTTTGAAGATCGATTTGCACGTCAGAACCTCTGCGAGCCTCCACCAGAGTTTCCTCTGGCTTCACTCTAGTCACGAATAGTTCACCATCTTTCGGGTACCTGCAGTGATGCTCTTACTCAAATCCATCCGAAGACATCAGGATCGGTCGATGGTGCGCCCTTCAGGGTTCCCACCTCCGTTCACTTTCATTGCGCGTATGGGTTTGACACCCAAACACTCGCATCACTGTAAGACTCCTTGGTCCGTGTTTCAAGACGGGTCGCTTACAACCATTACGCCAGCATCCTAGCCGGAGCGCGGTCCTCAGTCCCGGCAGGCGGCATGGCACCCAGGGCTATAACAGATGCCGAAGCGTCCTACATTCCCTGGGCCTTTATC…

## Sheet: TEF1a_Sequences
Translation elongation factor 1 aplha gene (EF1a) sequences submitted to NCBI GenBank with their GenBank Accession Numbers
Sequence Number	Organism	Isolate_Number	Region	GenBank No.
>Seq1	[organism=Lophodermella concolor]	[isolate=PT2C]	translation elongation factor 1 alpha (EF1a) gene partial cds	MN937646
GGCTGACTGCGCCATTCTCATCATTGCCGCTGGTACTGGTGAGTTCGAGGCTGGTATCTCCAAGGATGGCCAGACTCGTGAACACGCTCTCCTCGCTTATACCCTCGGCGTCAAGCAGCTCATTGTTGCCATCAACAAGATGGACACTACCAAGTGGTCCGAGGCTCGTTACCAGGAAATCATCAAGGAGACCTCCAACTTCATCAAGAAAGTCGGATACAACCCCAAGACTGTTGCGTTCGTTCCTATCTCTGGATTCAACGGTGATAACATGATTGACAACTCCACCAACTGCGCATGGTACAGGGGTTGGGAGAAAGAGACCAAGGCTGGCAAGTCCACCGGAAAGACCCTTCTCGAGGCTATTGACGCCATCGACCCACCTTCCCGCCCAACTGA…
>Seq2	[organism=Lophodermella concolor]	[isolate=FS6C]	translation elongation factor 1 alpha (EF1a) gene partial cds	MN937647
GGCTGACTGCGCCATTCTCATCATTGCCGCTGGTACTGGTGAGTTCGAGGCTGGTATCTCCAAGGATGGCCAGACTCGTGAACACGCTCTCCTCGCTTATACCCTCGGCGTCAAGCAGCTCATTGTTGCCATCAACAAGATGGACACTACCAAGTGGTCCGAGGCTCGTTACCAGGAAATCATCAAGGAGACCTCCAACTTCATCAAGAAAGTCGGATACAACCCCAAGACTGTTGCGTTCGTTCCTATCTCTGGATTCAACGGTGATAACATGATTGACAACTCCACCAACTGCGCATGGTACAGGGGTTGGGAGAAAGAGACCAAGGCTGGCAAGTCCACCGGAAAGACCCTTCTCGAGGCTATTGACGCCATCGACCCACCTTCCCGCCCAACTGA…
>Seq3	[organism=Lophodermella concolor]	[isolate=SR6C]	translation elongation factor 1 alpha (EF1a) gene partial cds	MN937648
GGCTGACTGCGCCATTCTCATCATTGCCGCTGGTACTGGTGAGTTCGAGGCTGGTATCTCCAAGGATGGCCAGACTCGTGAACACGCTCTCCTCGCTTATACCCTCGGCGTCAAGCAGCTCATTGTTGCCATCAACAAGATGGACACTACCAAGTGGTCCGAGGCTCGTTACCAGGAAATCATCAAGGAGACCTCCAACTTCATCAAGAAAGTCGGATACAACCCCAAGACTGTTGCGTTCGTTCCTATCTCTGGATTCAACGGTGATAACATGATTGACAACTCCACCAACTGCGCATGGTACAGGGGTTGGGAGAAAGAGACCAAGGCTGGCAAGTCCACCGGAAAGACCCTTCTCGAGGCTATTGACGCCATCGACCCACCTTCCCGCCCAACTGA…
>Seq4	[organism=Lophodermella concolor]	[isolate=SR3C]	translation elongation factor 1 alpha (EF1a) gene partial cds	MN937649
GGCTGACTGCGCCATTCTCATCATTGCCGCTGGTACTGGTGAGTTCGAGGCTGGTATCTCCAAGGATGGCCAGACTCGTGAACACGCTCTCCTCGCTTATACCCTCGGCGTCAAGCAGCTCATTGTTGCCATCAACAAGATGGACACTACCAAGTGGTCCGAGGCTCGTTACCAGGAAATCATCAAGGAGACCTCCAACTTCATCAAGAAAGTCGGATACAACCCCAAGACTGTTGCGTTCGTTCCTATCTCTGGATTCAACGGTGATAACATGATTGACAACTCCACCAACTGCGCATGGTACAGGGGTTGGGAGAAAGAGACCAAGGCTGGCAAGTCCACCGGAAAGACCCTTCTCGAGGCTATTGACGCCATCGACCCACCTTCCCGCCCAACTGA…
>Seq5	[organism=Lophodermella concolor]	[isolate=CS9C]	translation elongation factor 1 alpha (EF1a) gene partial cds	MN937650
GGCTGACTGCGCCATTCTCATCATTGCCGCTGGTACTGGTGAGTTCGAGGCTGGTATCTCCAAGGATGGCCAGACTCGTGAACACGCTCTCCTCGCTTATACCCTCGGCGTCAAGCAGCTCATTGTTGCCATCAACAAGATGGACACTACCAAGTGGTCCGAGGCTCGTTACCAGGAAATCATCAAGGAGACCTCCAACTTCATCAAGAAAGTCGGATACAACCCCAAGACTGTTGCGTTCGTTCCTATCTCTGGATTCAACGGTGATAACATGATTGACAACTCCACCAACTGCGCATGGTACAGGGGTTGGGAGAAAGAGACCAAGGCTGGCAAGTCCACCGGAAAGACCCTTCTCGAGGCTATTGACGCCATCGACCCACCTTCCCGCCCAACTGA…
>Seq6	[organism=Lophodermella concolor]	[isolate=CS6C]	translation elongation factor 1 alpha (EF1a) gene partial cds	MN937651
GGCTGACTGCGCCATTCTCATCATTGCCGCTGGTACTGGTGAGTTCGAGGCTGGTATCTCCAAGGATGGCCAGACTCGTGAACACGCTCTCCTCGCTTATACCCTCGGCGTCAAGCAGCTCATTGTTGCCATCAACAAGATGGACACTACCAAGTGGTCCGAGGCTCGTTACCAGGAAATCATCAAGGAGACCTCCAACTTCATCAAGAAAGTCGGATACAACCCCAAGACTGTTGCGTTCGTTCCTATCTCTGGATTCAACGGTGATAACATGATTGACAACTCCACCAACTGCGCATGGTACAGGGGTTGGGAGAAAGAGACCAAGGCTGGCAAGTCCACCGGAAAGACCCTTCTCGAGGCTATTGACGCCATCGACCCACCTTCCCGCCCAACTGA…
>Seq7	[organism=Lophodermella concolor]	[isolate=PT3C]	translation elongation factor 1 alpha (EF1a) gene partial cds	MN937652
GGCTGACTGCGCCATTCTCATCATTGCCGCTGGTACTGGTGAGTTCGAGGCTGGTATCTCCAAGGATGGCCAGACTCGTGAACACGCTCTCCTCGCTTATACCCTCGGCGTCAAGCAGCTCATTGTTGCCATCAACAAGATGGACACTACCAAGTGGTCCGAGGCTCGTTACCAGGAAATCATCAAGGAGACCTCCAACTTCATCAAGAAAGTCGGATACAACCCCAAGACTGTTGCGTTCGTTCCTATCTCTGGATTCAACGGTGATAACATGATTGACAACTCCACCAACTGCGCATGGTACAGGGGTTGGGAGAAAGAGACCAAGGCTGGCAAGTCCACCGGAAAGACCCTTCTCGAGGCTATTGACGCCATCGACCCACCTTCCCGCCCAACTGA…
>Seq8	[organism=Lophodermella concolor]	[isolate=FS8C]	translation elongation factor 1 alpha (EF1a) gene partial cds	MN937653
GGCTGACTGCGCCATTCTCATCATTGCCGCTGGTACTGGTGAGTTCGAGGCTGGTATCTCCAAGGATGGCCAGACTCGTGAACACGCTCTCCTCGCTTATACCCTCGGCGTCAAGCAGCTCATTGTTGCCATCAACAAGATGGACACTACCAAGTGGTCCGAGGCTCGTTACCAGGAAATCATCAAGGAGACCTCCAACTTCATCAAGAAAGTCGGATACAACCCCAAGACTGTTGCGTTCGTTCCTATCTCTGGATTCAACGGTGATAACATGATTGACAACTCCACCAACTGCGCATGGTACAGGGGTTGGGAGAAAGAGACCAAGGCTGGCAAGTCCACCGGAAAGACCCTTCTCGAGGCTATTGACGCCATCGACCCACCTTCCCGCCCAACTGA…
>Seq9	[organism=Lophodermella concolor]	[isolate=LP7C]	translation elongation factor 1 alpha (EF1a) gene partial cds	MN937654
GGCTGACTGCGCCATTCTCATCATTGCCGCTGGTACTGGTGAGTTCGAGGCTGGTATCTCCAAGGATGGCCAGACTCGTGAACACGCTCTCCTCGCTTATACCCTCGGCGTCAAGCAGCTCATTGTTGCCATCAACAAGATGGACACTACCAAGTGGTCCGAGGCTCGTTACCAGGAAATCATCAAGGAGACCTCCAACTTCATCAAGAAAGTCGGATACAACCCCAAGACTGTTGCGTTCGTTCCTATCTCTGGATTCAACGGTGATAACATGATTGACAACTCCACCAACTGCGCATGGTACAGGGGTTGGGAGAAAGAGACCAAGGCTGGCAAGTCCACCGGAAAGACCCTTCTCGAGGCTATTGACGCCATCGACCCACCTTCCCGCCCAACTGA…
>Seq10	[organism=Lophodermella concolor]	[isolate=LV8C]	translation elongation factor 1 alpha (EF1a) gene partial cds	MN937655
GGCTGACTGCGCCATTCTCATCATTGCCGCTGGTACTGGTGAGTTCGAGGCTGGTATCTCCAAGGATGGCCAGACTCGTGAACACGCTCTCCTCGCTTATACCCTCGGCGTCAAGCAGCTCATTGTTGCCATCAACAAGATGGACACTACCAAGTGGTCCGAGGCTCGTTACCAGGAAATCATCAAGGAGACCTCCAACTTCATCAAGAAAGTCGGATACAACCCCAAGACTGTTGCGTTCGTTCCTATCTCTGGATTCAACGGTGATAACATGATTGACAACTCCACCAACTGCGCATGGTACAGGGGTTGGGAGAAAGAGACCAAGGCTGGCAAGTCCACCGGAAAGACCCTTCTCGAGGCTATTGACGCCATCGACCCACCTTCCCGCCCAACTGA…
>Seq11	[organism=Lophodermella concolor]	[isolate=OJ11C]	translation elongation factor 1 alpha (EF1a) gene partial cds	MN937656
GGCTGACTGCGCCATTCTCATCATTGCCGCTGGTACTGGTGAGTTCGAGGCTGGTATCTCCAAGGATGGCCAGACTCGTGAACACGCTCTCCTCGCTTATACCCTCGGCGTCAAGCAGCTCATTGTTGCCATCAACAAGATGGACACTACCAAGTGGTCCGAGGCTCGTTACCAGGAAATCATCAAGGAGACCTCCAACTTCATCAAGAAAGTCGGATACAACCCCAAGACTGTTGCGTTCGTTCCTATCTCTGGATTCAACGGTGATAACATGATTGACAACTCCACCAACTGCGCATGGTACAGGGGTTGGGAGAAAGAGACCAAGGCTGGCAAGTCCACCGGAAAGACCCTTCTCGAGGCTATTGACGCCATCGACCCACCTTCCCGCCCAACTGA…
>Seq12	[organism=Lophodermella concolor]	[isolate=LV7C]	translation elongation factor 1 alpha (EF1a) gene partial cds	MN937657
GGCTGACTGCGCCATTCTCATCATTGCCGCTGGTACTGGTGAGTTCGAGGCTGGTATCTCCAAGGATGGCCAGACTCGTGAACACGCTCTCCTCGCTTATACCCTCGGCGTCAAGCAGCTCATTGTTGCCATCAACAAGATGGACACTACCAAGTGGTCCGAGGCTCGTTACCAGGAAATCATCAAGGAGACCTCCAACTTCATCAAGAAAGTCGGATACAACCCCAAGACTGTTGCGTTCGTTCCTATCTCTGGATTCAACGGTGATAACATGATTGACAACTCCACCAACTGCGCATGGTACAGGGGTTGGGAGAAAGAGACCAAGGCTGGCAAGTCCACCGGAAAGACCCTTCTCGAGGCTATTGACGCCATCGACCCACCTTCCCGCCCAACTGA…
>Seq13	[organism=Lophodermella arcuata]	[isolate=RMNP_LU1]	translation elongation factor 1 alpha (EF1a) gene partial cds	MN937658
TTGCCGCTGGTACTGGTGAGTTCGAGGCTGGTATCTCCAAGGATGGCCAGACTCGGGAGCACGCTCTCCTCGCTTACACCCTCGGTGTCAAGCAGCTCATCGTCGCCATCAACAAGATGGACACCACCAAGTGGTCCGAGGCTCGTTACCAGGAAATCATCAAGGAGACTTCCAACTTCATCAAGAAGGTCGGCTACAACCCCAAGACTGTTGCCTTCGTTCCTATCTCTGGATTCAACGGCGATAACATGATCGACAACTCCCCCAACTGCCCATGGTACAAGGGTTGGGAGAAGGAGACCAAGGCTGGCAAGTCCACCGGAAAGACCCTTCTCGAGGCTATCGATGCTATCGATCCACCCTCCCGTCCAACTGACAAGCCCCTCCGTCTTCCTCTCC…
>Seq14	[organism=Lophodermella montivaga]	[isolate=SR9M]	translation elongation factor 1 alpha (EF1a) gene partial cds	MN937659
GTCCTCATCATTGCCGCCGGTACTGGTGAGTTCGAGGCTGGTATCTCCAAGGATGGCCAGACTCGTGAGCACGCTCTCCTCGCTTACACCCTCGGTGTTAAGCAGCTCATCGTCGCCATCAACAAGATGGACACCACCAAGTGGTCCGAGGCTCGTTACCAGGAAATCATCAAGGAGACTTCCAACTTCATCAAGAAGGTCGGCTACAACCCCAAGACTGTTGCCTTTGTTCCTATCTCTGGATTCAACGGTGACAACATGATCGACAACTCCGCCAACTGCCCCTGGTACAAGGGTTGGGAGAAGGAGACCAAGGCTGGCAAGTCCACCGGAAAGACCCTTCTCGAGGCCATTGATGCTATCGACCCACCCTCCCGTCCAACTGACAAGCCCCTCCGT…
>Seq15	[organism=Lophodermella montivaga]	[isolate=PT8M]	translation elongation factor 1 alpha (EF1a) gene partial cds	MN937660
CCTCATCATTGCCGCCGGTACTGGTGAGTTCGAGGCTGGTATCTCCAAGGATGGCCAGACTCGTGAGCACGCTCTCCTCGCTTACACCCTCGGTGTTAAGCAGCTCATCGTCGCCATCAACAAGATGGACACCACCAAGTGGTCCGAGGCTCGTTACCAGGAAATCATCAAGGAGACTTCCAACTTCATCAAGAAGGTCGGCTACAACCCCAAGACTGTTGCCTTTGTTCCTATCTCTGGATTCAACGGTGACAACATGATCGACAACTCCGCCAACTGCCCCTGGTACAAGGGTTGGGAGAAGGAGACCAAGGCTGGCAAGTCCACCGGAAAGACCCTTCTCGAGGCCATTGATGCTATCGACCCACCCTCCCGTCCAACTGACAAGCCCCTCCGTCT…
>Seq16	[organism=Lophodermella montivaga]	[isolate=PT6M]	translation elongation factor 1 alpha (EF1a) gene partial cds	MN937661
CCTCATCATTGCCGCCGGTACTGGTGAGTTCGAGGCTGGTATCTCCAAGGATGGCCAGACTCGTGAGCACGCTCTCCTCGCTTACACCCTCGGTGTTAAGCAGCTCATCGTCGCCATCAACAAGATGGACACCACCAAGTGGTCCGAGGCTCGTTACCAGGAAATCATCAAGGAGACTTCCAACTTCATCAAGAAGGTCGGCTACAACCCCAAGACTGTTGCCTTTGTTCCTATCTCTGGATTCAACGGTGACAACATGATCGACAACTCCGCCAACTGCCCCTGGTACAAGGGTTGGGAGAAGGAGACCAAGGCTGGCAAGTCCACCGGAAAGACCCTTCTCGAGGCCATTGATGCTATCGACCCACCCTCCCGTCCAACTGACAAGCCCCTCCGTCT…
>Seq17	[organism=Lophodermella montivaga]	[isolate=TL8M]	translation elongation factor 1 alpha (EF1a) gene partial cds	MN937662
TCCTCATCATTGCCGCCGGTACTGGTGAGTTCGAGGCTGGTATCTCCAAGGATGGCCAGACTCGTGAGCACGCTCTCCTCGCTTACACCCTCGGTGTTAAGCAGCTCATCGTCGCCATCAACAAGATGGACACCACCAAGTGGTCCGAGGCTCGTTACCAGGAAATCATCAAGGAGACTTCCAACTTCATCAAGAAGGTCGGCTACAACCCCAAGACTGTTGCCTTTGTTCCTATCTCTGGATTCAACGGTGACAACATGATCGACAACTCCGCCAACTGCCCCTGGTACAAGGGTTGGGAGAAGGAGACCAAGGCTGGCAAGTCCACCGGAAAGACCCTTCTCGAGGCCATTGATGCTATCGACCCACCCTCCCGTCCAACTGACAAGCCCCTCCGTC…
>Seq18	[organism=Lophodermella montivaga]	[isolate=PT11M]	translation elongation factor 1 alpha (EF1a) gene partial cds	MN937663
GGCTGATTGCGCCGTCCTCATCATTGCCGCCGGTACTGGTGAGTTCGAGGCTGGTATCTCCAAGGATGGCCAGACTCGTGAGCACGCTCTCCTCGCTTACACCCTCGGTGTTAAGCAGCTCATCGTCGCCATCAACAAGATGGACACCACCAAGTGGTCCGAGGCTCGTTACCAGGAAATCATCAAGGAGACTTCCAACTTCATCAAGAAGGTCGGCTACAACCCCAAGACTGTTGCCTTTGTTCCTATCTCTGGATTCAACGGTGACAACATGATCGACAACTCCGCCAACTGCCCCTGGTACAAGGGTTGGGAGAAGGAGACCAAGGCTGGCAAGTCCACCGGAAAGACCCTTCTCGAGGCCATTGATGCTATCGACCCACCCTCCCGTCCAACTGA…
>Seq19	[organism=Lophophacidium dooksii]	[isolate=MB5]	translation elongation factor 1 alpha (EF1a) gene partial cds	MN937664
CTGATTGCGCCGTCCTCATCATTGCCGCTGGTACTGGTGAGTTCGAGGCTGGTATCTCCAAGGATGGCCAGACTCGTGAGCACGCTCTCCTCGCTTACACCCTCGGTGTCAAGCAGCTCATCGTCGCCATCAACAAGATGGACACCACCAAGTGGTCCGAGGCTCGTTACCAGGAAATCATCAAGGAGACTTCCAACTTCATCAAGAAGGTCGGCTACAACCCCAAGACTGTTGCCTTTGTTCCCATCTCTGGATTCAACGGTGACAACATGATCGACAACTCCACCAACTGCCCATGGTACAAGGGTTGGGAGAAGGAGACCAAGGCTGGCAAGTCAACCGGAAAGACCCTTCTCGAGGCTATCGATGCTATCGACCCACCCTCGCGTCCAACTGACA…
>Seq20	[organism=Lophodermella sp.]	[isolate=RMNP_01]	translation elongation factor 1 alpha (EF1a) gene partial cds	MN937665
GGCTGATTGCGCCGTCCTCATCATTGCCGCTGGTACTGGTGAGTTCGAGGCTGGTATCTCCAAGGATGGCCAGACTCGTGAGCACGCTCTCCTCGCTTACACCCTCGGTGTCAAGCAGCTCATCGTCGCCATCAACAAGATGGACACCACCAAGTGGTCCGAGGCTCGTTACCAGGAAATCATCAAGGAGACTTCCAACTTCATCAAGAAGGTCGGCTACAACCCCAAGACTGTTGCCTTTGTTCCTATCTCGGGATTCAACGGTGACAACATGATCGACAACTCCGCCAACTGCCCATGGTACAAGGGTTGGGAGAAGGAGACCAAGGCTGGCAAGTCCACCGGAAAGACCCTTCTCGAGGCTATCGATGCTATCGACCCACCCTCCCGTCCAACTGA…
>Seq21	[organism=Lophodermella montivaga]	[isolate=TC3M]	translation elongation factor 1 alpha (EF1a) gene partial cds	MN937666
GGCTGATTGCGCCGTCCTCATCATTGCCGCCGGTACTGGTGAGTTCGAGGCTGGTATCTCCAAGGATGGCCAGACTCGTGAGCACGCTCTCCTCGCTTACACCCTCGGTGTTAAGCAGCTCATCGTCGCCATCAACAAGATGGACACCACCAAGTGGTCCGAGGCTCGTTACCAGGAAATCATCAAGGAGACTTCCAACTTCATCAAGAAGGTCGGCTACAACCCCAAGACTGTTGCCTTTGTTCCTATCTCTGGATTCAACGGTGACAACATGATCGACAACTCCGCCAACTGCCCCTGGTACAAGGGTTGGGAGAAGGAGACCAAGGCTGGCAAGTCCACCGGAAAGACCCTTCTCGAGGCCATTGATGCTATCGACCCACCCTCCCGTCCAACTGA…
>Seq22	[organism=Lophodermella montivaga]	[isolate=NC2M]	translation elongation factor 1 alpha (EF1a) gene partial cds	MN937667
GGCTGATTGCGCCGTCCTCATCATTGCCGCCGGTACTGGTGAGTTCGAGGCTGGTATCTCCAAGGATGGCCAGACTCGTGAGCACGCTCTCCTCGCTTACACCCTCGGTGTTAAGCAGCTCATCGTCGCCATCAACAAGATGGACACCACCAAGTGGTCCGAGGCTCGTTACCAGGAAATCATCAAGGAGACTTCCAACTTCATCAAGAAGGTCGGCTACAACCCCAAGACTGTTGCCTTTGTTCCTATCTCTGGATTCAACGGTGACAACATGATCGACAACTCCGCCAACTGCCCCTGGTACAAGGGTTGGGAGAAGGAGACCAAGGCTGGCAAGTCCACCGGAAAGACCCTTCTCGAGGCCATTGATGCTATCGACCCACCCTCCCGTCCAACTGA…
>Seq23	[organism=Lophodermella montivaga]	[isolate=NC9M]	translation elongation factor 1 alpha (EF1a) gene partial cds	MN937668
GGCTGATTGCGCCGTCCTCATCATTGCCGCCGGTACTGGTGAGTTCGAGGCTGGTATCTCCAAGGATGGCCAGACTCGTGAGCACGCTCTCCTCGCTTACACCCTCGGTGTTAAGCAGCTCATCGTCGCCATCAACAAGATGGACACCACCAAGTGGTCCGAGGCTCGTTACCAGGAAATCATCAAGGAGACTTCCAACTTCATCAAGAAGGTCGGCTACAACCCCAAGACTGTTGCCTTTGTTCCTATCTCTGGATTCAACGGTGACAACATGATCGACAACTCCGCCAACTGCCCCTGGTACAAGGGTTGGGAGAAGGAGACCAAGGCTGGCAAGTCCACCGGAAAGACCCTTCTCGAGGCCATTGATGCTATCGACCCACCCTCCCGTCCAACTGA…
>Seq24	[organism=Lophodermella montivaga]	[isolate=CU1M]	translation elongation factor 1 alpha (EF1a) gene partial cds	MN937669
GGCTGATTGCGCCGTCCTCATCATTGCCGCCGGTACTGGTGAGTTCGAGGCTGGTATCTCCAAGGATGGCCAGACTCGTGAGCACGCTCTCCTCGCTTACACCCTCGGTGTTAAGCAGCTCATCGTCGCCATCAACAAGATGGACACCACCAAGTGGTCCGAGGCTCGTTACCAGGAAATCATCAAGGAGACTTCCAACTTCATCAAGAAGGTCGGCTACAACCCCAAGACTGTTGCCTTTGTTCCTATCTCTGGATTCAACGGTGACAACATGATCGACAACTCCGCCAACTGCCCCTGGTACAAGGGTTGGGAGAAGGAGACCAAGGCTGGCAAGTCCACCGGAAAGACCCTTCTCGAGGCCATTGATGCTATCGACCCACCCTCCCGTCCAACTGA…
>Seq25	[organism=Lophodermella montivaga]	[isolate=PT10M]	translation elongation factor 1 alpha (EF1a) gene partial cds	MN937670
AGGCTGATTGCGCCGTCCTCATCATTGCCGCCGGTACTGGTGAGTTCGAGGCTGGTATCTCCAAGGATGGCCAGACTCGTGAGCACGCTCTCCTCGCTTACACCCTCGGTGTTAAGCAGCTCATCGTCGCCATCAACAAGATGGACACCACCAAGTGGTCCGAGGCTCGTTACCAGGAAATCATCAAGGAGACTTCCAACTTCATCAAGAAGGTCGGCTACAACCCCAAGACTGTTGCCTTTGTTCCTATCTCTGGATTCAACGGTGACAACATGATCGACAACTCCGCCAACTGCCCCTGGTACAAGGGTTGGGAGAAGGAGACCAAGGCTGGCAAGTCCACCGGAAAGACCCTTCTCGAGGCCATTGATGCTATCGACCCACCCTCCCGTCCAACTG…
>Seq26	[organism=Lophodermella montivaga]	[isolate=NC8M]	translation elongation factor 1 alpha (EF1a) gene partial cds	MN937671
GGCTGATTGCGCCGTCCTCATCATTGCCGCCGGTACTGGTGAGTTCGAGGCTGGTATCTCCAAGGATGGCCAGACTCGTGAGCACGCTCTCCTCGCTTACACCCTCGGTGTTAAGCAGCTCATCGTCGCCATCAACAAGATGGACACCACCAAGTGGTCCGAGGCTCGTTACCAGGAAATCATCAAGGAGACTTCCAACTTCATCAAGAAGGTCGGCTACAACCCCAAGACTGTTGCCTTTGTTCCTATCTCTGGATTCAACGGTGACAACATGATCGACAACTCCGCCAACTGCCCCTGGTACAAGGGTTGGGAGAAGGAGACCAAGGCTGGCAAGTCCACCGGAAAGACCCTTCTCGAGGCCATTGATGCTATCGACCCACCCTCCCGTCCAACTGA…
>Seq27	[organism=Lophodermella montivaga]	[isolate=LVP3M]	translation elongation factor 1 alpha (EF1a) gene partial cds	MN937672
CCAGGCTGATTGCGCCGTCCTCATCATTGCCGCCGGTACTGGTGAGTTCGAGGCTGGTATCTCCAAGGATGGCCAGACTCGTGAGCACGCTCTCCTCGCTTACACCCTCGGTGTTAAGCAGCTCATCGTCGCCATCAACAAGATGGACACCACCAAGTGGTCCGAGGCTCGTTACCAGGAAATCATCAAGGAGACTTCCAACTTCATCAAGAAGGTCGGCTACAACCCCAAGACTGTTGCCTTTGTTCCTATCTCTGGATTCAACGGTGACAACATGATCGACAACTCCGCCAACTGCCCCTGGTACAAGGGTTGGGAGAAGGAGACCAAGGCTGGCAAGTCCACCGGAAAGACCCTTCTCGAGGCCATTGATGCTATCGACCCACCCTCCCGTCCAAC…
>Seq28	[organism=Lophodermella montivaga]	[isolate=TC9M]	translation elongation factor 1 alpha (EF1a) gene partial cds	MN937673
CCAGGCTGATTGCGCCGTCCTCATCATTGCCGCCGGTACTGGTGAGTTCGAGGCTGGTATCTCCAAGGATGGCCAGACTCGTGAGCACGCTCTCCTCGCTTACACCCTCGGTGTTAAGCAGCTCATCGTCGCCATCAACAAGATGGACACCACCAAGTGGTCCGAGGCTCGTTACCAGGAAATCATCAAGGAGACTTCCAACTTCATCAAGAAGGTCGGCTACAACCCCAAGACTGTTGCCTTTGTTCCTATCTCTGGATTCAACGGTGACAACATGATCGACAACTCCGCCAACTGCCCCTGGTACAAGGGTTGGGAGAAGGAGACCAAGGCTGGCAAGTCCACCGGAAAGACCCTTCTCGAGGCCATTGATGCTATCGACCCACCCTCCCGTCCAAC…
>Seq29	[organism=Lophodermella montivaga]	[isolate=NC6M]	translation elongation factor 1 alpha (EF1a) gene partial cds	MN937674
CCAGGCTGATTGCGCCGTCCTCATCATTGCCGCCGGTACTGGTGAGTTCGAGGCTGGTATCTCCAAGGATGGCCAGACTCGTGAGCACGCTCTCCTCGCTTACACCCTCGGTGTTAAGCAGCTCATCGTCGCCATCAACAAGATGGACACCACCAAGTGGTCCGAGGCTCGTTACCAGGAAATCATCAAGGAGACTTCCAACTTCATCAAGAAGGTCGGCTACAACCCCAAGACTGTTGCCTTTGTTCCTATCTCTGGATTCAACGGTGACAACATGATCGACAACTCCGCCAACTGCCCCTGGTACAAGGGTTGGGAGAAGGAGACCAAGGCTGGCAAGTCCACCGGAAAGACCCTTCTCGAGGCCATTGATGCTATCGACCCACCCTCCCGTCCAAC…
>Seq30	[organism=Lophodermella sulcigena]	[isolate=PH18_0656]	translation elongation factor 1 alpha (EF1a) gene partial cds	MN937675
CATCGTGATTTYATCAAGAACATGATCACTGGTACCTCCCAGGCTGATTGCGCCGTCCTCATCATTGCCGCCGGTACTGGTGAGTTCGAGGCTGGTATCTCCAAGGATGGCCAGACTCGTGAGCACGCTCTCCTCGCTTACACCCTCGGTGTCAAGCAGCTCATCGTCGCCATCAACAAGATGGACACCACCAAGTGGTCCGAGGCTCGTTACCAGGAAATAATCAAGGAGACTTCCAACTTCATCAAGAAGGTCGGATACAACCCCAAGACTGTTGCCTTTGTTCCTATCTCTGGATTCAACGGTGACAACATGATCGACAACTCCGCCAACTGCCCCTGGTACAAGGGTTGGGAGAAGGAGACCAAGGCTGGCAAGTCCACCGGAAAGACCCTTCTC…
>Seq31	[organism=Lophodermella conjuncta]	[isolate=PHP19_0986]	translation elongation factor 1 alpha (EF1a) gene partial cds	MN937676
TGGTACCTCTCAGGCCGATTGTGCCATTCTCATCATTGCTGCTGGTACTGGTGAATTCGAAGCTGGTATCTCCAAGGATGGTCAGACTCGTGAACACGCTCTCCTTGCATACACTCTTGGTGTCAAACAACTTATCGTCGCCATCAACAAGATGGACACCACCAAGTGGTCCGAAGCTCGTTTCCAAGAAATTATCAAGGAGACTTCCAACTTCATCAAGAAGGTTGGATACAACCCCAAGACTGTTGCCTTTGTCCCCATCTCTGGGTTCAACGGTGATAACATGATCGATAATTCAACCAACTGCCCATGGTACAAGGGTTGGGAGAAGGAGACCAAGGCTGGAAAGAACACCGGGAAGACTCTGCTCGAGGCTATCGATGCCATTGACCCACCTTC…
>Seq32	[organism=Lophodermella conjuncta]	[isolate=PH18_0655]	translation elongation factor 1 alpha (EF1a) gene partial cds	MN937677
CATCGTGATTTYATCAAGAACATGATCACTGGTACCTCTCAGGCCGATTGTGCCATTCTCATCATTGCTGCTGGTACTGGTGAATTCGAAGCTGGTATCTCCAAGGATGGTCAGACTCGTGAACACGCTCTCCTTGCATACACTCTTGGTGTCAAACAACTTATCGTCGCCATCAACAAGATGGACACCACCAAGTGGTCCGAAGCTCGTTTCCAAGAAATTATCAAGGAGACTTCCAACTTCATCAAGAAGGTTGGATACAACCCCAAGACTGTTGCCTTTGTCCCCATCTCTGGGTTCAACGGTGATAACATGATCGATAATTCAACCAACTGCCCATGGTACAAGGGTTGGGAGAAGGAGACCAAGGCTGGAAAGAACACCGGGAAGACTCTGCTC…
>Seq33	[organism=Lophodermella conjuncta]	[isolate=PHP19_0987]	translation elongation factor 1 alpha (EF1a) gene partial cds	MN937678
CATCGTGATTTYATCAAGAACATGATCACTGGTACCTCTCAGGCCGATTGTGCCATTCTCATCATTGCTGCTGGTACTGGTGAATTCGAAGCTGGTATCTCCAAGGATGGTCAGACTCGTGAACACGCTCTCCTTGCATACACTCTTGGTGTCAAACAACTTATCGTCGCCATCAACAAGATGGACACCACCAAGTGGTCCGAAGCTCGTTTCCAAGAAATTATCAAGGAGACTTCCAACTTCATCAAGAAGGTTGGATACAACCCCAAGACTGTTGCCTTTGTCCCCATCTCTGGGTTCAACGGTGATAACATGATCGATAATTCAACCAACTGCCCATGGTACAAGGGTTGGGAGAAGGAGACCAAGGCTGGAAAGAACACCGGGAAGACTCTGCTC…
>Seq34	[organism=Lophodermella montivaga]	[isolate=NC10M]	translation elongation factor 1 alpha (EF1a) gene partial cds	MT919224
CCAGGCTGATTGCGCCGTCCTCATCATTGCCGCCGGTACTGGTGAGTTCGAGGCTGGTATCTCCAAGGATGGCCAGACTCGTGAGCACGCTCTCCTCGCTTACACCCTCGGTGTTAAGCAGCTCATCGTCGCCATCAACAAGATGGACACCACCAAGTGGTCCGAGGCTCGTTACCAGGAAATCATCAAGGAGACTTCCAACTTCATCAAGAAGGTCGGCTACAACCCCAAGACTGTTGCCTTTGTTCCTATCTCTGGATTCAACGGTGACAACATGATCGACAACTCCGCCAACTGCCCCTGGTACAAGGGTTGGGAGAAGGAGACCAAGGCTGGCAAGTCCACCGGAAAGACCCTTCTCGAGGCCATTGATGCTATCGACCCACCCTCCCGTCCAAC…
>Seq35	[organism=Lophodermella montivaga]	[isolate=TL9M]	translation elongation factor 1 alpha (EF1a) gene partial cds	MT919225
TCCTCATCATTGCCGCCGGTACTGGTGAGTTCGAGGCTGGTATCTCCAAGGATGGCCAGACTCGTGAGCACGCTCTCCTCGCTTACACCCTCGGTGTTAAGCAGCTCATCGTCGCCATCAACAAGATGGACACCACCAAGTGGTCCGAGGCTCGTTACCAGGAAATCATCAAGGAGACTTCCAACTTCATCAAGAAGGTCGGCTACAACCCCAAGACTGTTGCCTTTGTTCCTATCTCTGGATTCAACGGTGACAACATGATCGACAACTCCGCCAACTGCCCCTGGTACAAGGGTTGGGAGAAGGAGACCAAGGCTGGCAAGTCCACCGGAAAGACCCTTCTCGAGGCCATTGATGCTATCGACCCACCCTCCCGTCCAACTGACAAGCCCCTCCGTC…
>Seq36	[organism=Lophodermella montivaga]	[isolate=OJ3M]	translation elongation factor 1 alpha (EF1a) gene partial cds	MT919226
TTGCGCCGTCCTCATCATTGCCGCCGGTACTGGTGAGTTCGAGGCTGGTATCTCCAAGGATGGCCAGACTCGTGAGCACGCTCTCCTCGCTTACACCCTCGGTGTTAAGCAGCTCATCGTCGCCATCAACAAGATGGACACCACCAAGTGGTCCGAGGCTCGTTACCAGGAAATCATCAAGGAGACTTCCAACTTCATCAAGAAGGTCGGCTACAACCCCAAGACTGTTGCCTTTGTTCCTATCTCTGGATTCAACGGTGACAACATGATCGACAACTCCGCCAACTGCCCCTGGTACAAGGGTTGGGAGAAGGAGACCAAGGCTGGCAAGTCCACCGGAAAGACCCTTCTCGAGGCCATTGATGCTATCGACCCACCCTCCCGTCCAACTGACAAGCC…
>Seq37	[organism=Lophodermella arcuata]	[isolate=RMNP_LU16]	translation elongation factor 1 alpha (EF1a) gene partial cds	MT919227
TGCGCCGTCCTCATCATTGCCGCTGGTACTGGTGAGTTCGAGGCTGGTATCTCCAAGGATGGCCAGACTCGGGAGCACGCTCTCCTCGCTTACACCCTCGGTGTCAAGCAGCTCATCGTCGCCATCAACAAGATGGACACCACCAAGTGGTCCGAGGCTCGTTACCAGGAAATCATCAAGGAGACTTCCAACTTCATCAAGAAGGTCGGCTACAACCCCAAGACTGTTGCCTTCGTTCCTATCTCTGGATTCAACGGCGATAACATGATCGACAACTCCCCCAACTGCCCATGGTACAAGGGTTGGGAGAAGGAGACCAAGGCTGGCAAGTCCACCGGAAAGACCCTTCTCGAGGCTATCGACGCTATCGATCCACCCTCCCGTCCAACTGACAAGCCC…
